# Supplementary material
Source: PubMed Central journal article supplement (PMC8126933)
Supplement: EMBJ-40-e104847-s002.pdf [file EMBJ-40-e104847-s002.pdf]

## Appendix PDF

### Table of Content

|                                                                         |    |
|-------------------------------------------------------------------------|----|
| Appendix Table S1: Analysis of the allelic recombination products ..... | 2  |
| Appendix Table S2: Yeast strains used in this study.....                | 3  |
| Appendix Table S3: Primers used in this study.....                      | 7  |
| Appendix Figure S1.....                                                 | 9  |
| Appendix Figure S2.....                                                 | 10 |
| Appendix Figure S3.....                                                 | 11 |
| Appendix Figure Legends .....                                           | 12 |

**Appendix Table S1. Analysis of the allelic recombination products.** The percentage of indicated products among tested colonies. Number of tested colonies is shown in parentheses.

|                                       | "BIR"           | Gene conversion   | Cross-over     | Chromosome loss | Others          |
|---------------------------------------|-----------------|-------------------|----------------|-----------------|-----------------|
| WT<br>(597)                           | 0.5<br>(3)      | 81.37<br>(485.75) | 16.75<br>(100) | 0.67<br>(4)     | 0.71<br>(4.25)  |
| <i>rad59</i><br>(623)                 | 2.81<br>(17.5)  | 80.42<br>(501)    | 15.41<br>(96)  | 0.1<br>(0.75)   | 1.26<br>(7.75)  |
| <i>rad52-R70A</i><br>(509)            | 6.73<br>(34.25) | 72.94<br>(371.25) | 15.32<br>(78)  | 3.14<br>(16)    | 1.87<br>(9.5)   |
| <i>rad59 rad52-R70A</i><br>(571)      | 8.84<br>(50.5)  | 64.58<br>(368.75) | 16.46<br>(94)  | 6.79<br>(38.75) | 3.33<br>(19)    |
| <i>pif1</i><br>(491)                  | 0.41<br>(2)     | 82.99<br>(407.5)  | 15.07<br>(74)  | 0.71<br>(3.5)   | 0.81<br>(4)     |
| <i>pif1 rad52-R70A</i><br>(755)       | 1.03<br>(7.75)  | 81.09<br>(612.25) | 16.42<br>(124) | 0.73<br>(5.5)   | 0.73<br>(5.5)   |
| <i>mre11</i><br>(510)                 | 7.84<br>(40)    | 64.8<br>(330.5)   | 17.25<br>(88)  | 6.18<br>(31.5)  | 3.92<br>(20)    |
| <i>mph1</i><br>(402)                  | 0.62<br>(2.5)   | 76<br>(305.5)     | 22.39<br>(90)  | 0<br>(0)        | 1<br>(4)        |
| <i>mph1 rad59</i><br>(664)            | 8.06<br>(53.5)  | 69.62<br>(462.25) | 17.17<br>(114) | 0.15<br>(1)     | 5.01<br>(33.25) |
| <i>mph1 rad52-R70A</i><br>(604)       | 10.35<br>(62.5) | 63.82<br>(385.5)  | 17.22<br>(104) | 1.9<br>(11.5)   | 6.71<br>(40.5)  |
| <i>mph1 rad59 rad52-R70A</i><br>(541) | 11.65<br>(63)   | 63.86<br>(345.5)  | 13.31<br>(72)  | 7.95<br>(43)    | 3.23<br>(17.5)  |

**Appendix Table S2: Yeast strains used in this study.**

| Strain name                   | Parental Strain | Genotype                                                                                                                                                                                              | Source                |
|-------------------------------|-----------------|-------------------------------------------------------------------------------------------------------------------------------------------------------------------------------------------------------|-----------------------|
| <b>A. Original strains</b>    |                 |                                                                                                                                                                                                       |                       |
| YAM033                        |                 | <i>ho ade3::GAL10::HO HML<math>\alpha</math>-inc MATa hmr::ADE1 bar1::ADE3 nej1::KANMX ade1 leu2,3-112 trp1::hisG ura3-52 thr4 lys5</i>                                                               | (Mehta et. al., 2017) |
| JKM139                        |                 | <i>MATa ho hml::ADE1 hmr::ADE1 ade1 leu2-3,-112 lys5 trp1::hisG ura3-52 lys5 ade3::GAL10::HO</i>                                                                                                      | (Lee et. al, 1998)    |
| JKM179                        |                 | <i>MAT<math>\alpha</math> ho hml::ADE1 hmr::ADE1 ade1 leu2-3,-112 lys5 trp1::hisG ura3-52 lys5 ade3::GAL10::HO</i>                                                                                    | (Lee et. al, 1998)    |
| <b>B. H-150 system</b>        |                 |                                                                                                                                                                                                       |                       |
| YAM095                        |                 | <i>ho ade3::GAL10::HO HML<math>\alpha</math>-inc MATa hmr::ADE1 bar1::ADE3 nej1::KANMX ade1 leu2,3-112 trp1::hisG ura3-52 thr4 lys5, W<math>\Delta</math>, MAT X<math>\Delta</math>150bp::Cg-TRP1</i> | (Mehta et. al., 2017) |
| NP493                         | YAM095          | <i>rad59::NATMX</i>                                                                                                                                                                                   | This study            |
| NP532                         | YAM095          | <i>rad52-R70A</i>                                                                                                                                                                                     | This study            |
| NP534                         | YAM095          | <i>rad59::NATMX rad52-R70A</i>                                                                                                                                                                        | This study            |
| NP817                         | YAM095          | <i>sir2::HPHMX</i>                                                                                                                                                                                    | This study            |
| NP852                         | YAM095          | <i>yku70::NATMX</i>                                                                                                                                                                                   | This study            |
| NP853                         | YAM095          | <i>mre11::HPHMX</i>                                                                                                                                                                                   | This study            |
| NP857                         | YAM095          | <i>yku70::NATMX mre11::HPHMX</i>                                                                                                                                                                      | This study            |
| NP856                         | YAM095          | <i>rad51::LEU2MX</i>                                                                                                                                                                                  | This study            |
| NP868                         | YAM095          | <i>rad52::HPHMX</i>                                                                                                                                                                                   | This study            |
| NP859                         | YAM095          | <i>dot1::NATMX</i>                                                                                                                                                                                    | This study            |
| <b>C. H-150 no gap system</b> |                 |                                                                                                                                                                                                       |                       |
| NP764                         | NP578           | <i>W<math>\Delta</math> MAT X<math>\Delta</math> Y<math>\alpha</math>150bp::Cg-TRP1</i>                                                                                                               | This study            |
| NP743                         | NP764           | <i>rad59::NATMX</i>                                                                                                                                                                                   | This study            |
| NP775                         | NP764           | <i>rad52-R70A</i>                                                                                                                                                                                     | This study            |
| NP751                         | NP764           | <i>rad59::NATMX rad52-R70A</i>                                                                                                                                                                        | This study            |
| NP829                         | NP764           | <i>sir2::HPHMX</i>                                                                                                                                                                                    | This study            |
| NP843                         | NP764           | <i>mre11::HPHMX</i>                                                                                                                                                                                   | This study            |
| NP870                         | NP764           | <i>yku70::NATMX</i>                                                                                                                                                                                   | This study            |
| NP873                         | NP764           | <i>yku70::NATMX mre11::HPHMX</i>                                                                                                                                                                      | This study            |
| <b>D. H-1400 system</b>       |                 |                                                                                                                                                                                                       |                       |
| NP575                         | YAM033          | <i>rad59::NATMX</i>                                                                                                                                                                                   | This study            |
| NP576                         | YAM033          | <i>rad52-R70A</i>                                                                                                                                                                                     | This study            |
| NP577                         | YAM033          | <i>rad59::NATMX rad52-R70A</i>                                                                                                                                                                        | This study            |
| NP664                         | YAM033          | <i>mph1::HPHMX</i>                                                                                                                                                                                    | This study            |
| NP665                         | YAM033          | <i>mph1::HPHMX rad59::NATMX</i>                                                                                                                                                                       | This study            |
| NP696                         | YAM033          | <i>mph1::HPHMX rad52-R70A</i>                                                                                                                                                                         | This study            |
| NP697                         | YAM033          | <i>mph1::HPHMX rad59::NATMX rad5-2R70A</i>                                                                                                                                                            | This study            |

|                                 |               |                                                                                                                                                                   |            |
|---------------------------------|---------------|-------------------------------------------------------------------------------------------------------------------------------------------------------------------|------------|
| NP818                           | YAM033        | <i>sir2::HPHMX</i>                                                                                                                                                | This study |
| <b>E. H-2100 system</b>         |               |                                                                                                                                                                   |            |
| NP578                           | YAM033        | <i>ho ade3::GAL10::HO HML<math>\alpha</math>-inc MAT<math>\alpha</math><br/>hmr::ADE1 bar1::ADE3 nej1::KANMX ade1<br/>leu2,3-112 trp1::hisG ura3-52 thr4 lys5</i> | This study |
| NP579                           | NP578         | <i>rad59::NATMX</i>                                                                                                                                               | This study |
| NP580                           | NP578         | <i>rad52-R70A</i>                                                                                                                                                 | This study |
| <b>F. Allelic Recombination</b> |               |                                                                                                                                                                   |            |
| NP633                           | YAM033        | <i>MAT<math>\alpha</math>-inc HML<math>\alpha</math>-inc hmr::ADE1 bar1::ADE3<br/>ade1 leu2,3-112 trp1::hisG ura3-52 thr4 lys5<br/>ade3::GAL10::HO</i>            | This study |
| NP676                           | JKM139        | <i>kiTRP</i> inserted at location 17130<br><i>LEU2</i> at 296670 on Chr III                                                                                       | This study |
| NP643                           | NP633         | <i>KANMX</i> inserted at location 296670 on Chr III                                                                                                               | This study |
| NP677                           | NP676         | <i>rad59::NATMX</i>                                                                                                                                               | This study |
| NP681                           | NP676         | <i>rad52-R70A</i>                                                                                                                                                 | This study |
| NP682                           | NP676         | <i>rad59::NATMX rad52-R70A</i>                                                                                                                                    | This study |
| NP645                           | NP643         | <i>rad59::NATMX</i>                                                                                                                                               | This study |
| NP646                           | NP643         | <i>rad52-R70A</i>                                                                                                                                                 | This study |
| NP647                           | NP643         | <i>rad59::NATMX rad52-R70A</i>                                                                                                                                    | This study |
| NP698                           | NP676 x NP643 | <i>MAT<math>\alpha</math>/MAT<math>\alpha</math>-inc</i>                                                                                                          | This study |
| NP699                           | NP677 x NP645 | <i>rad59::NATMX/ rad59::NATMX</i>                                                                                                                                 | This study |
| NP700                           | NP681 x NP646 | <i>rad52-R70A/ rad52-R70A</i>                                                                                                                                     | This study |
| NP701                           | NP682 x NP647 | <i>rad59::NATMX/rad59::NATMX<br/>rad52-R70A/rad52-R70A</i>                                                                                                        | This study |
| NP729                           | NP676         | <i>ura3<math>\Delta</math></i>                                                                                                                                    | This study |
| NP728                           | NP643         | <i>ura3<math>\Delta</math></i>                                                                                                                                    | This study |
| NP769                           | NP677         | <i>ura3<math>\Delta</math></i>                                                                                                                                    | This study |
| NP712                           | NP645         | <i>ura3<math>\Delta</math></i>                                                                                                                                    | This study |
| NP714                           | NP681         | <i>ura3<math>\Delta</math></i>                                                                                                                                    | This study |
| NP713                           | NP646         | <i>ura3<math>\Delta</math></i>                                                                                                                                    | This study |
| NP794                           | NP729         | <i>pif1::HPHMX</i>                                                                                                                                                | This study |
| NP795                           | NP728         | <i>pif1::HPHMX</i>                                                                                                                                                | This study |
| NP815                           | NP728 x NP729 | <i>pif1::HPHMX/ pif1::HPHMX</i>                                                                                                                                   | This study |
| NP798                           | NP714         | <i>pif1::HPHMX</i>                                                                                                                                                | This study |
| NP811                           | NP713         | <i>pif1::HPHMX</i>                                                                                                                                                | This study |
| NP816                           | NP798 x NP811 | <i>pif1::HPHMX/pif1::HPHMX<br/>rad52-R70A/rad52-R70A</i>                                                                                                          | This study |
| NP693                           | NP676         | <i>mph1::HPHMX</i>                                                                                                                                                | This study |
| NP662                           | NP643         | <i>mph1::HPHMX</i>                                                                                                                                                | This study |
| NP702                           | NP662 x NP693 | <i>mph1::HPHMX/ mph1::HPHMX</i>                                                                                                                                   | This study |
| NP694                           | NP677         | <i>mph1::HPHMX</i>                                                                                                                                                | This study |
| NP671                           | NP645         | <i>mph1::HPHMX</i>                                                                                                                                                | This study |

|                              |               |                                                                                                                                                                           |                     |
|------------------------------|---------------|---------------------------------------------------------------------------------------------------------------------------------------------------------------------------|---------------------|
| NP703                        | NP694 x NP671 | <i>mph1::HPHMX/mph1::HPHMX<br/>rad59::NATMX/rad59::NATMX</i>                                                                                                              | This study          |
| NP710                        | NP681         | <i>mph1::HPHMX</i>                                                                                                                                                        | This study          |
| NP673                        | NP646         | <i>mph1::HPHMX</i>                                                                                                                                                        | This study          |
| NP705                        | NP673 x NP710 | <i>mph1::HPHMX/mph1::HPHMX<br/>rad52-R70A/rad52-R70A</i>                                                                                                                  | This study          |
| NP695                        | NP682         | <i>mph1::HPHMX</i>                                                                                                                                                        | This study          |
| NP674                        | NP647         | <i>mph1::HPHMX</i>                                                                                                                                                        | This study          |
| NP706                        | NP695 x NP674 | <i>mph1::HPHMX/mph1::HPHMX<br/>rad59::NATMX/rad59::NATMX<br/>rad52-R70A/rad52-R70A</i>                                                                                    | This study          |
| NP814                        | NP729         | <i>mre11::HPHMX</i>                                                                                                                                                       | This study          |
| NP835                        | NP728         | <i>mre11::HPHMX</i>                                                                                                                                                       | This study          |
| NP841                        | NP814 x NP835 | <i>mre11::HPHMX/mre11::HPHMX</i>                                                                                                                                          | This study          |
| <b>G. Mutation analysis</b>  |               |                                                                                                                                                                           |                     |
| NP754                        | NP728         | <i>HYG-ura3-29</i> inserted 16kb away from <i>MAT<math>\alpha</math>-inc</i>                                                                                              | This study          |
| NP783                        | NP712         | <i>HYG-ura3-29</i> inserted 16kb away from <i>MAT<math>\alpha</math>-inc</i>                                                                                              | This study          |
| NP733                        | NP713         | <i>HYG-ura3-29</i> inserted 16kb away from <i>MAT<math>\alpha</math>-inc</i>                                                                                              | This study          |
| NP757                        | NP729 x NP754 |                                                                                                                                                                           | This study          |
| NP786                        | NP769 x NP783 |                                                                                                                                                                           | This study          |
| NP755                        | NP733 x NP714 |                                                                                                                                                                           | This study          |
| <b>H. H-0 system</b>         |               |                                                                                                                                                                           |                     |
| NP477                        | YAM033        | <i>W<math>\Delta</math>, MAT X<math>\Delta</math>::Cg-TRP1</i>                                                                                                            | This study          |
| NP494                        | YAM033        | <i>rad59::NATMX</i>                                                                                                                                                       | This study          |
| NP531                        | YAM033        | <i>rad52-R70A</i>                                                                                                                                                         | This study          |
| NP625                        | YAM033        | <i>rad59::NATMX rad52-R70A</i>                                                                                                                                            | This study          |
| NP717                        | NP477         | <i>mph1::HPHMX</i>                                                                                                                                                        | This study          |
| NP718                        | NP477         | <i>mph1::HPHMX rad5-2R70A</i>                                                                                                                                             | This study          |
| NP828                        | NP477         | <i>sir2::HPHMX</i>                                                                                                                                                        | This study          |
| <b>I. HR-0 system</b>        |               |                                                                                                                                                                           |                     |
| NP582                        |               | <i>ho ade3::GAL10::HO HMRA-inc MAT<math>\alpha</math> hml::ADE1<br/>bar1::ADE3 ade1 leu2,3-112 trp1::hisG ura3-52<br/>thr4 lys5</i>                                       | This study          |
| NP860                        | NP582         | <i>W<math>\Delta</math>, MAT X<math>\Delta</math>::Cg-TRP1</i>                                                                                                            | This study          |
| <b>J. Disomic BIR system</b> |               |                                                                                                                                                                           |                     |
| AM1003                       |               | <i>MAT<math>\alpha</math>-LEU2-tel/MAT<math>\alpha</math>-inc ade1 met13 ura3 leu2-3,112/leu2 thr4 lys5 hml::ADE1/hml::ADE3<br/>hmr::HYG ade3::GAL10::HO FS2::NAT/FS2</i> | (Deem et. al. 2008) |
| yWH271                       | AM1003        | <i>MAT<math>\alpha</math>-KANMX-tel/MAT<math>\alpha</math>-inc ade1 met13 ura3 leu2-3,112/leu2 thr4 lys5 hml::ADE1/hml::ADE3<br/>hmr::HYG ade3::GAL-HO FS2::NAT/FS2</i>   | This study          |
| NP667                        | yWH271        | <i>rad59::LEU2MX</i>                                                                                                                                                      | This study          |
| NP660                        | yWH271        | <i>rad52-R70A</i>                                                                                                                                                         | This study          |
| NP668                        | yWH271        | <i>rad59::LEU2MX rad52-R70A</i>                                                                                                                                           | This study          |

| <b>K. Resection analysis</b>                  |        |                                                                                                                                    |                       |
|-----------------------------------------------|--------|------------------------------------------------------------------------------------------------------------------------------------|-----------------------|
| NP541                                         | JKM139 | <i>rad52-R70A</i>                                                                                                                  | This study            |
| AP485                                         | JKM139 | <i>rad52::KANMX</i>                                                                                                                | This study            |
| NP729                                         |        | <i>WT</i>                                                                                                                          | This study            |
| NP814                                         | NP729  | <i>mre11::HPHMX</i>                                                                                                                | This study            |
| NP851                                         | NP729  | <i>yku70::NATMX</i>                                                                                                                | This study            |
| NP875                                         | NP729  | <i>yku70::NATMX mre11::HPHMX</i>                                                                                                   | This study            |
| <b>L. Recombination assay on chromosome V</b> |        |                                                                                                                                    |                       |
| yRA97                                         |        | <i>hoΔ mat::hisG hmlΔ::hisG HMRA-stk ura3Δ851 trp1Δ63 leu2Δ::KAN hmrΔ::ADE3 ade3::GAL10::HO can1Δ::UR::HOcs::A3::TRP1 RA::LEU2</i> | (Anand et. al., 2014) |
| NP844                                         | yRA97  | <i>rad52-R70A</i>                                                                                                                  | This study            |
| NP872                                         | yRA97  | <i>sir2::HPHMX</i>                                                                                                                 | This study            |

**Appendix Table S3: Primers used in this study**

| Name                 | 5' → 3' sequence                                                                       | Comments                                 |
|----------------------|----------------------------------------------------------------------------------------|------------------------------------------|
| MATa distal Fw       | ATTGGCTATACGGGACGG                                                                     | To make <i>MAT</i> distal probe          |
| MATa distal Rv       | CTTAGCTTGTACCAGAGG                                                                     |                                          |
| Z probe Fw           | CGCAACAGTATAATTTTATAAA                                                                 | To make Z probe                          |
| Z probe Rv           | ATGAGTGTATAAACAAACATTG                                                                 |                                          |
| SSA probe Fw         | ATTGTACGCCAACTTAAGACC                                                                  | To make SSA probe                        |
| SSA probe Rv         | GATATCACCAAACATGTTGC                                                                   |                                          |
| ACT1 probe Fw        | TCTTCCCATCTATCGTCCGGTAGAC                                                              | To make control <i>ACT1</i> probe        |
| ACT1 probe Rv        | GGTCAATACCGGCAGATTCC                                                                   |                                          |
| MATa resect Fw       | CTAAAGTAGAGCAACATACATTACACA                                                            | MAT probe (resection)                    |
| MATa resect Rv       | ACATCAAGATCGTTTATGGTTAAGATA                                                            |                                          |
| BPL1 Fw              | CCAGGATCAGTTAAGCATGCTG                                                                 | To make control <i>BPL1</i> probe        |
| BPL1 Rv              | ATTCAGGGTGTGGTCCAGTGAG                                                                 |                                          |
| TRP1 probe Fw        | GCATGGTATCACTACACACATC                                                                 | To make <i>TRP1</i> probe                |
| TRP1 probe Rv        | AACCACACACTTTAACGAGCAT                                                                 |                                          |
| FEN2 probe Fw        | CACCAATGCATATATATCCG                                                                   | To make <i>FEN2</i> probe                |
| FEN2 probe Rv        | GAATAGTCGACCAGTCTAAC                                                                   |                                          |
| HML distal Fw        | GGAAAATGCGTGTTCCCTTGT                                                                  | To make HML distal probe                 |
| HML distal Rv        | TCATTGCAAACGTCGGGCTTT                                                                  |                                          |
| H F1                 | gatatcttttaatggtgtctcactatcttccaataagactctaccagat<br>TCGAG GTCGACGGTATC                | To construct H-0 systems                 |
| H-0 R1               | acttttcttttggagttttatacagtttccccgaaagaacaaaaatcaag<br>CGCTCTAGAAGTAGTGGATC             |                                          |
| H-150 no gap R1      | gtaatgtctctaaaagccataaatgagtttaatatcttgaagatt<br>CGCTCTAGAAGTAGTGGATC                  | Use with H F1 to construct H-150 no-gap  |
| kiTRP(III) F1        | gggcttaacaggagccgccccatgcggaatcatgtctccgagcagaggact<br>tttaatagag GGCCAGAAGACTAAGAGGTG | To make <i>kiTRP1</i> insertion cassette |
| kiTRP(III) R1        | ttttcttttctcttttgcgagtagtaatacaccggaacggaaactaatg<br>AAAGTGGAACGATCATTCACTATAT         |                                          |
| LEU2(III) F1         | acaattcaagatctgtatcatttacactaacacaccccatttaatagag<br>ATGTCTGCCCCTAAGAAGAT              | To make <i>LEU2</i> insertion cassette   |
| LEU2(III) R1         | aatgatgcagtggcgatatcatatgcaaaagaaatgtaggaagtactcag<br>TTAAGCAAGGATTTTCTTAACCTTCT       |                                          |
| KanMX(III) F1        | acaattcaagatctgtatcatttacactaacacaccccatttaatagag<br>GACATGGAGGCCAGAATAC               | To make <i>KANMX</i> insertion cassette  |
| KanMX(III) R1        | aatgatgcagtggcgatatcatatgcaaaagaaatgtaggaagtactcag<br>CAGTATAGCGACCAGCATTC             |                                          |
| gRNA-URA3(V)         | GTTGATTATGACACCCGGTG                                                                   | gRNA targeting <i>ura3-52</i>            |
| <i>ura3</i> template | TCTTAACCCAACTGCACAGAACAAAA<br>CCTGCAGGAAACGAAGATAAATCAAAA                              | Template to delete <i>URA3</i>           |

|                               |                                                                                  |                                       |
|-------------------------------|----------------------------------------------------------------------------------|---------------------------------------|
|                               | CTGTATTATAAGTAAATGCATGTATACT<br>AAACTCACAAATTAGAGC                               |                                       |
| gRNA-RAD52                    | ACTCTCTTGGAGATATACTC                                                             | gRNA targeting<br><i>RAD52</i>        |
| <i>rad52-R70A</i><br>template | CAAGAAATTAGGACCTGAGTATATCTC<br>CAAGGCAGTTGGGTTTGAACAAGCA<br>GGATTGCATACATCGAAGGT | Template to make<br><i>rad52-R70A</i> |

\*Primer sequences for other gene deletions are available upon request. All gene disruptions/alterations were confirmed by PCR. Point mutations were confirmed by Sanger sequencing.

### Supplemental references

- Anand R, Beach A, Li K, Haber J. 2017. Rad51-mediated double-strand break repair and mismatch correction of divergent substrates. *Nature* **544**: 377-380.
- Church, G.M., and Gilbert, W. (1985). The genomic sequencing technique. *Prog. Clin. Biol. Res.* **177**, 17–21.
- Deem A, Barker K, Vanhulle K, Downing B, Vayl A, Malkova A. Defective break-induced replication leads to half-crossovers in *Saccharomyces cerevisiae*. *Genetics*. 2008;179:1845–1860.
- Lee, S. E., Moore, J. K., Holmes, A., Umez, K., Kolodner, R. D., and Haber, J. E. (1998). *Saccharomyces* Ku70, mre11/rad50 and RPA proteins regulate adaptation to G2/M arrest after DNA damage. *Cell* **94**, 399-409.
- Mehta A, Beach A, Haber JE. 2017. Homology Requirements and Competition between Gene Conversion and Break-Induced Replication during Double-Strand Break Repair. *Mol Cell* **65**: 515-526 e513.
- Rothstein, R. J. (1983) One-step gene disruption in yeast, *Methods Enzymol* **101**, 202-211.
- Wilson MA, Kwon Y, Xu Y, Chung WH, Chi P, Niu H, Mayle R, Chen X, Malkova A, Sung P, Ira G. Pif1 helicase and Pol $\delta$  promote recombination-coupled DNA synthesis via bubble migration. *Nature*. 2013;502:393–396
- Vaze M, Pellicoli A, Lee S, Ira G, Liberi G, Arbel-Eden A, Foiani M, Haber J. 2002. Recovery from checkpoint-mediated arrest after repair of a double-strand break requires srs2 helicase. *Mol Cell* **10**: 373-385.



## A. H-150

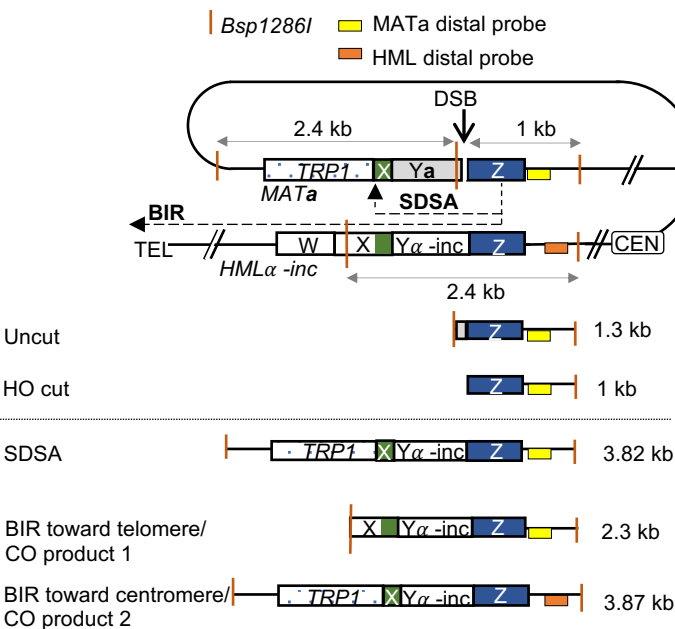

## B. H-150 no-gap

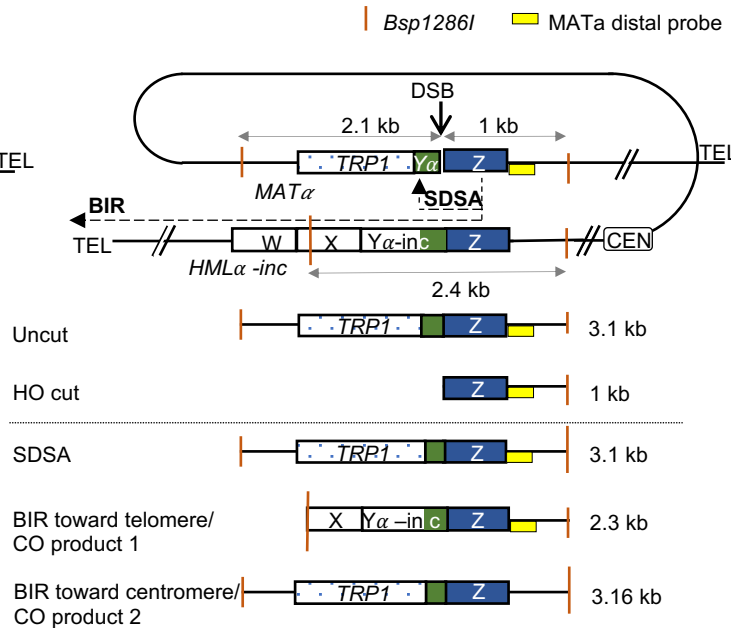

## C. H-1400

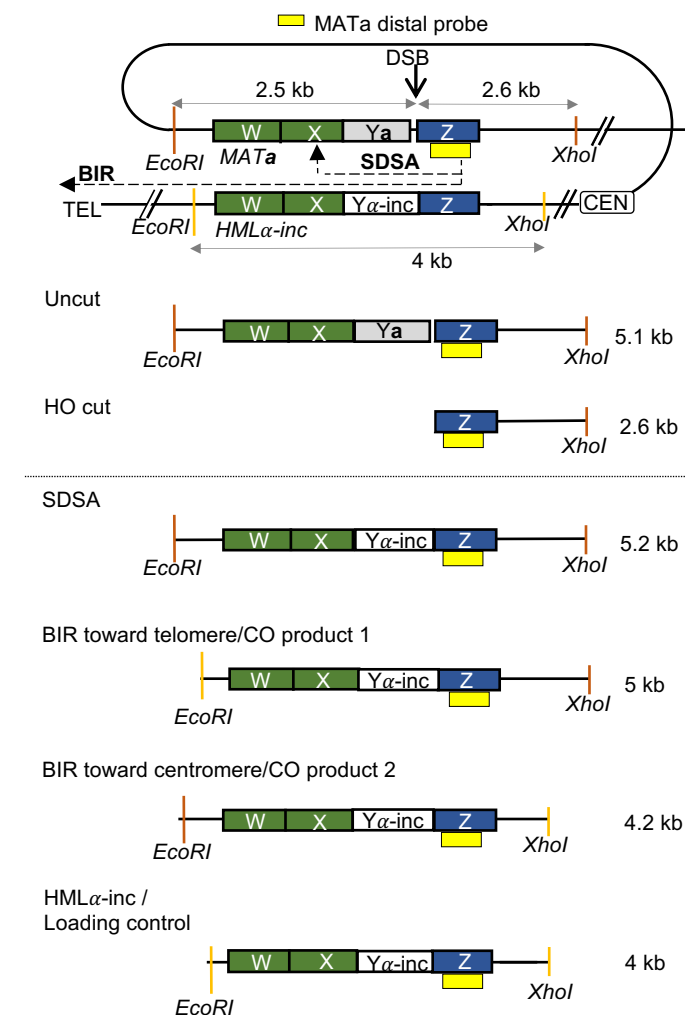

## D. H-2100

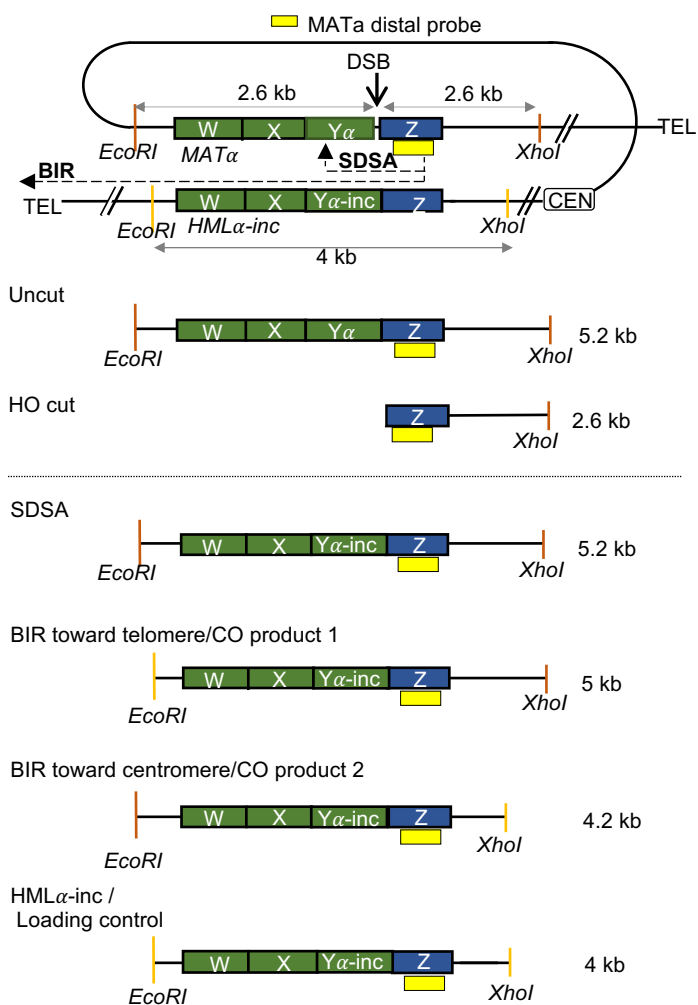

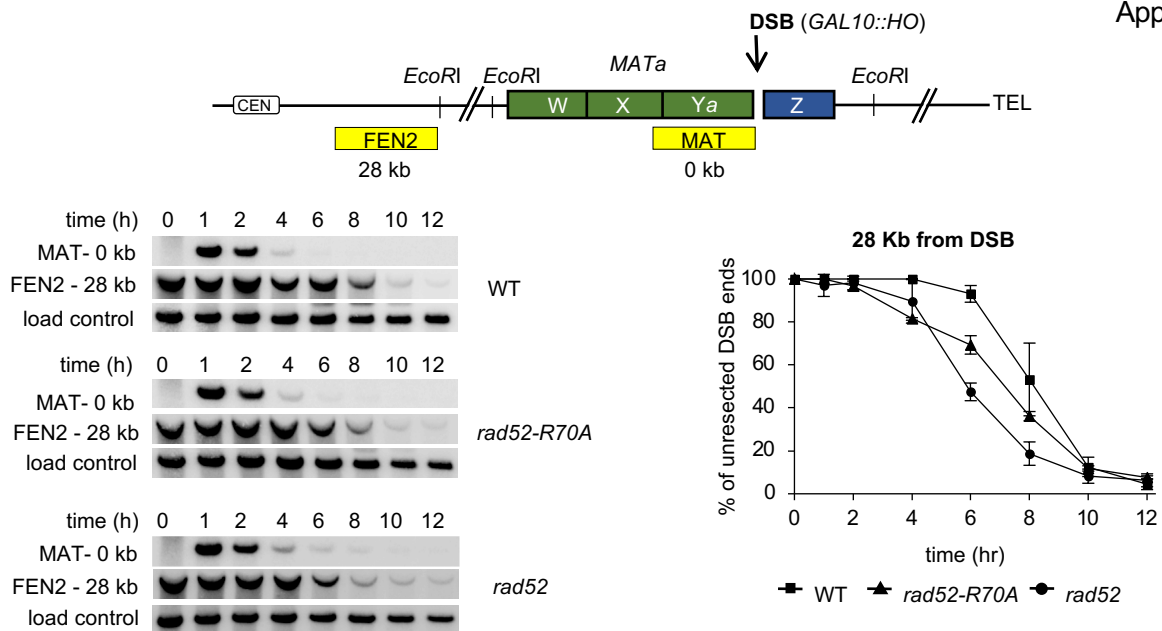**B. H-150**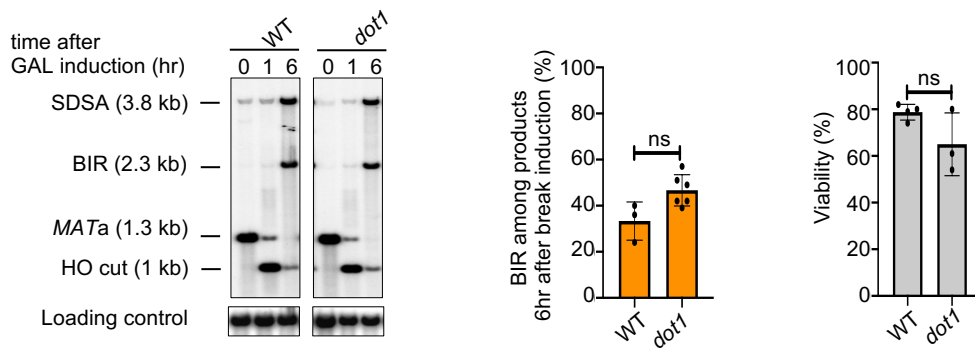**C. H-150**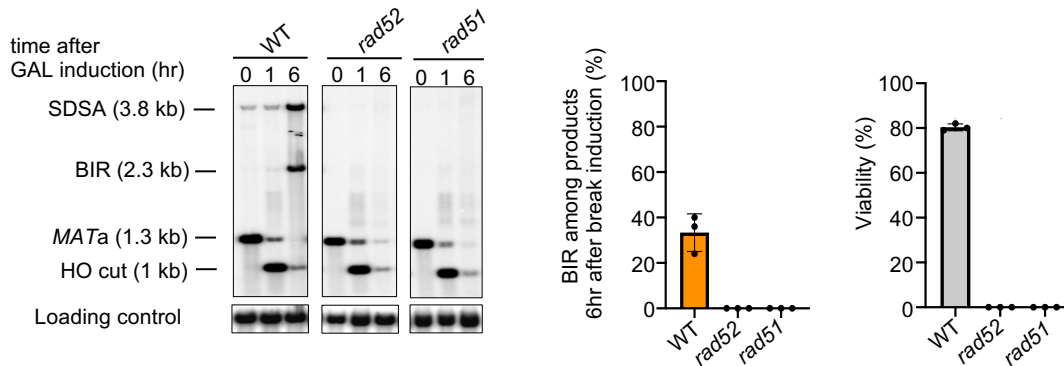

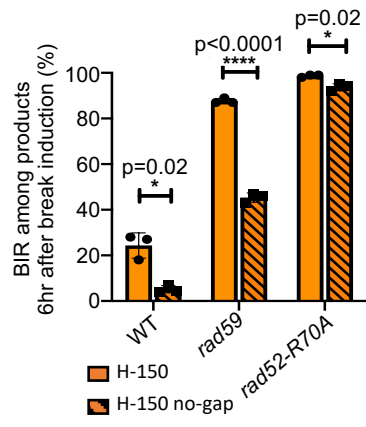

### **Appendix Figure S1. Schematic of recombination assays used in figure 1 and 2**

Restriction enzyme sites, size of different repair outcomes, and the position of probes used for Southern blots are shown.

### **Appendix Figure S2. Role of resection, Rad52 and Rad51 in repair pathway choice**

(A) Schematic of resection assay including sites of restriction enzyme *EcoRI* cleavage and location of *MAT* and *FEN2* probe (top), representative of Southern blots (bottom left) and graph showing kinetics of extensive resection measured 28 kb from DSB (bottom right) in WT, *rad52* $\Delta$  and *rad52-R70A* mutant cells.

(B) Representative Southern blots showing DSB repair products (left), percentage of BIR product among repair outcomes by 6 hr (middle) and viability (right) of WT and *dot1* $\Delta$  cells in H-150 assay.

(C) Representative Southern blots showing DSB repair products in WT, *rad52* $\Delta$ , and *rad51* $\Delta$  cells in H-150 assay (left), percentage of BIR products among repair outcomes by 6 hr (middle), and viability of indicated strains (right) are shown. The wild-type control is the same as in figure S2B as experiments in figures S2B and S2C are parallel.

### **Appendix Figure S3. Comparison of BIR product in H-150 assays with gap and without gap of WT, *rad59* $\Delta$ , *rad52-R70A***

The percentage of BIR products among repair outcomes by 6 hrs in H-150 and H-150 no-gap assays. The data were taken from the same experiments as shown in figure 1 and 2.
