# Supplementary material
Source: PubMed Central journal article supplement (PMC8126933)
Supplement: EMBJ-40-e104847-s003.pdf [file EMBJ-40-e104847-s003.pdf]

Figure 6A

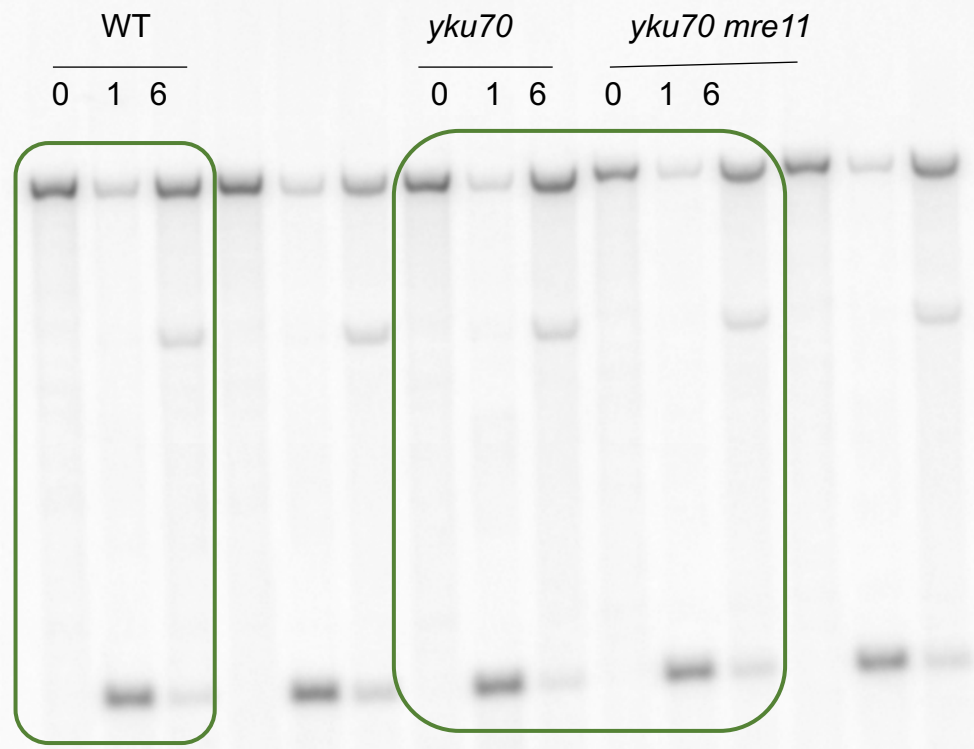

MATa distal probe

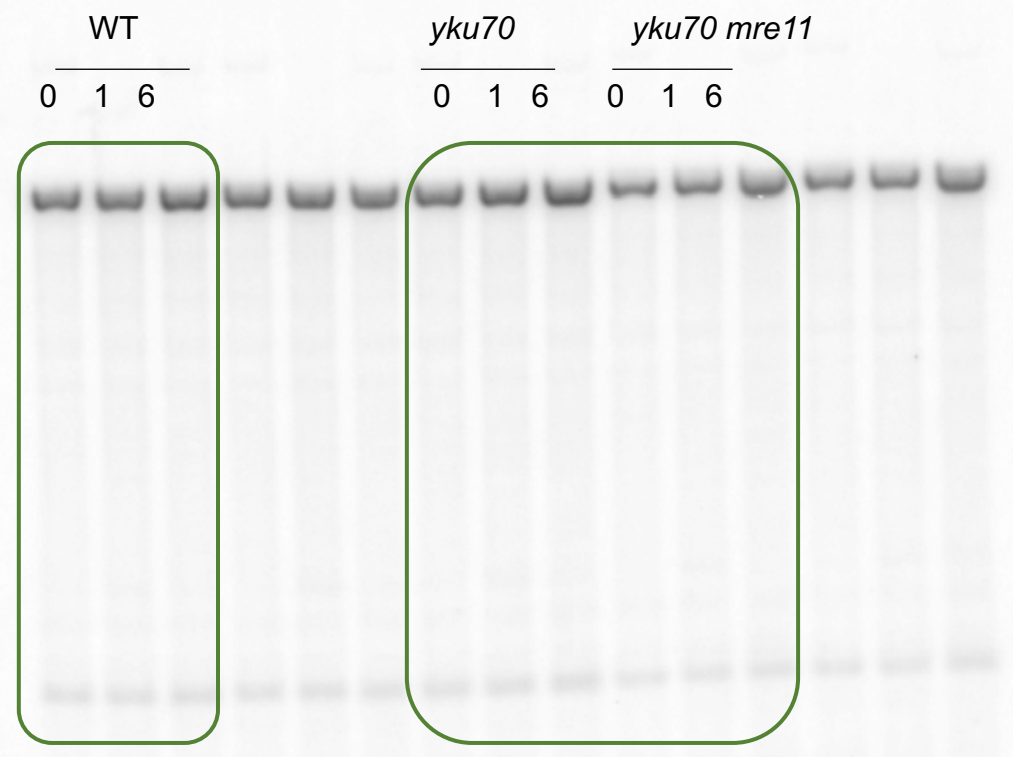

ACT1 probe

Figure 6A

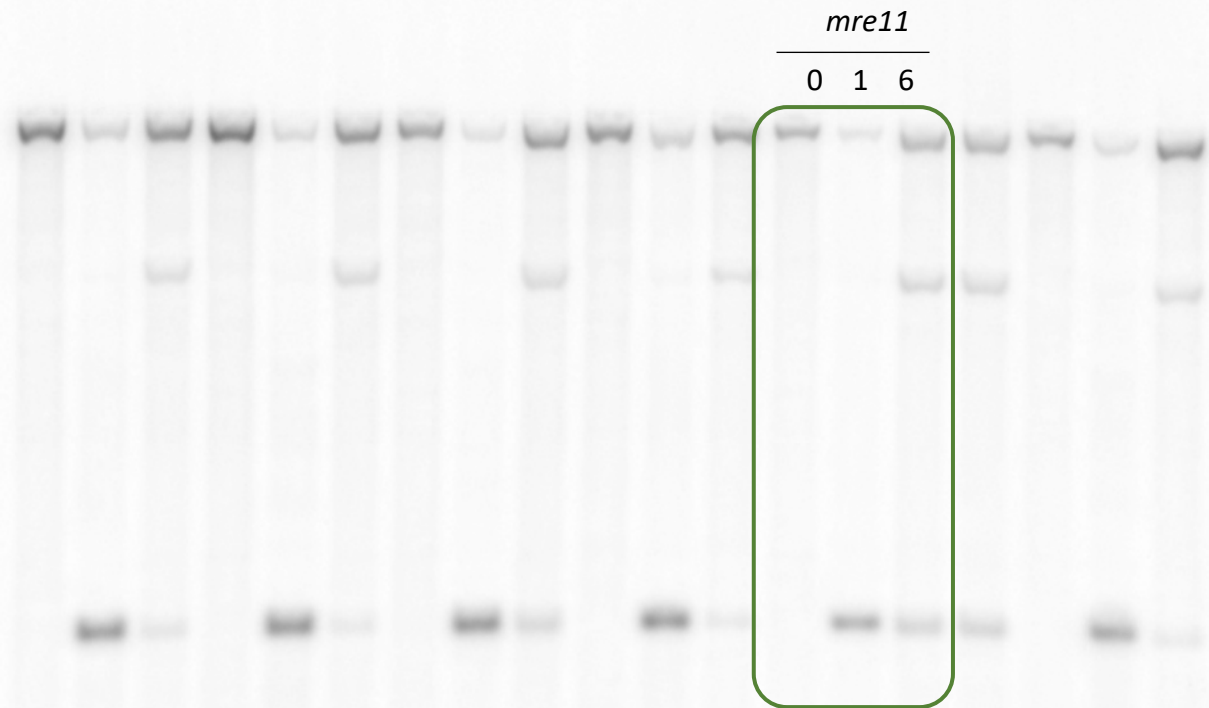

MATa distal probe

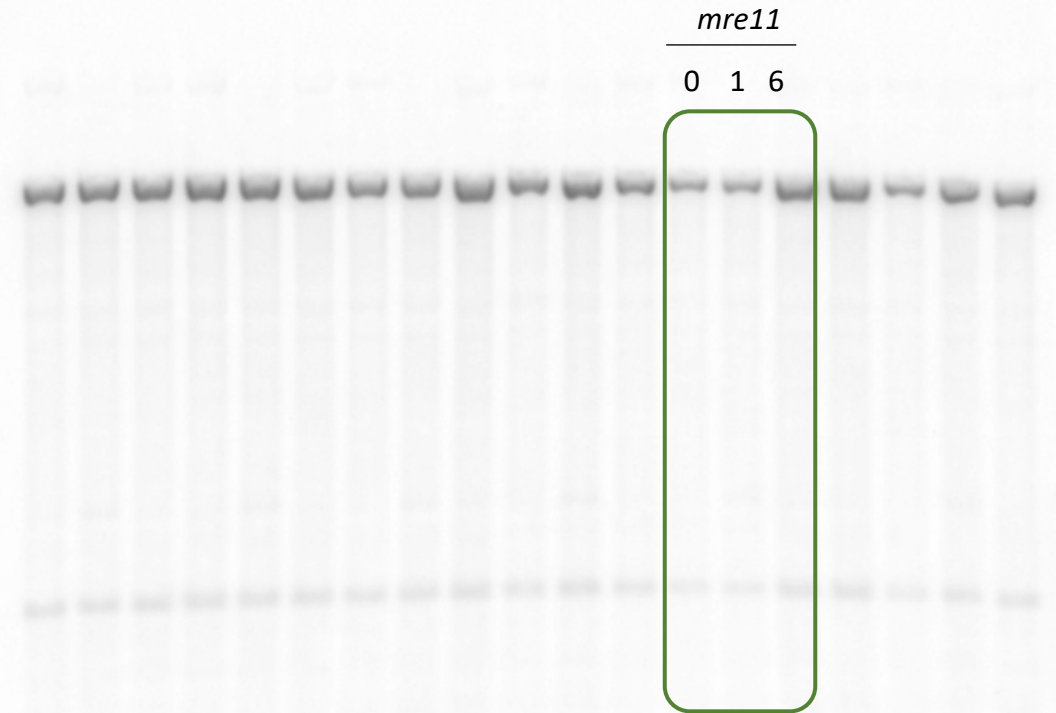

ACT1 probe

Figure 6B

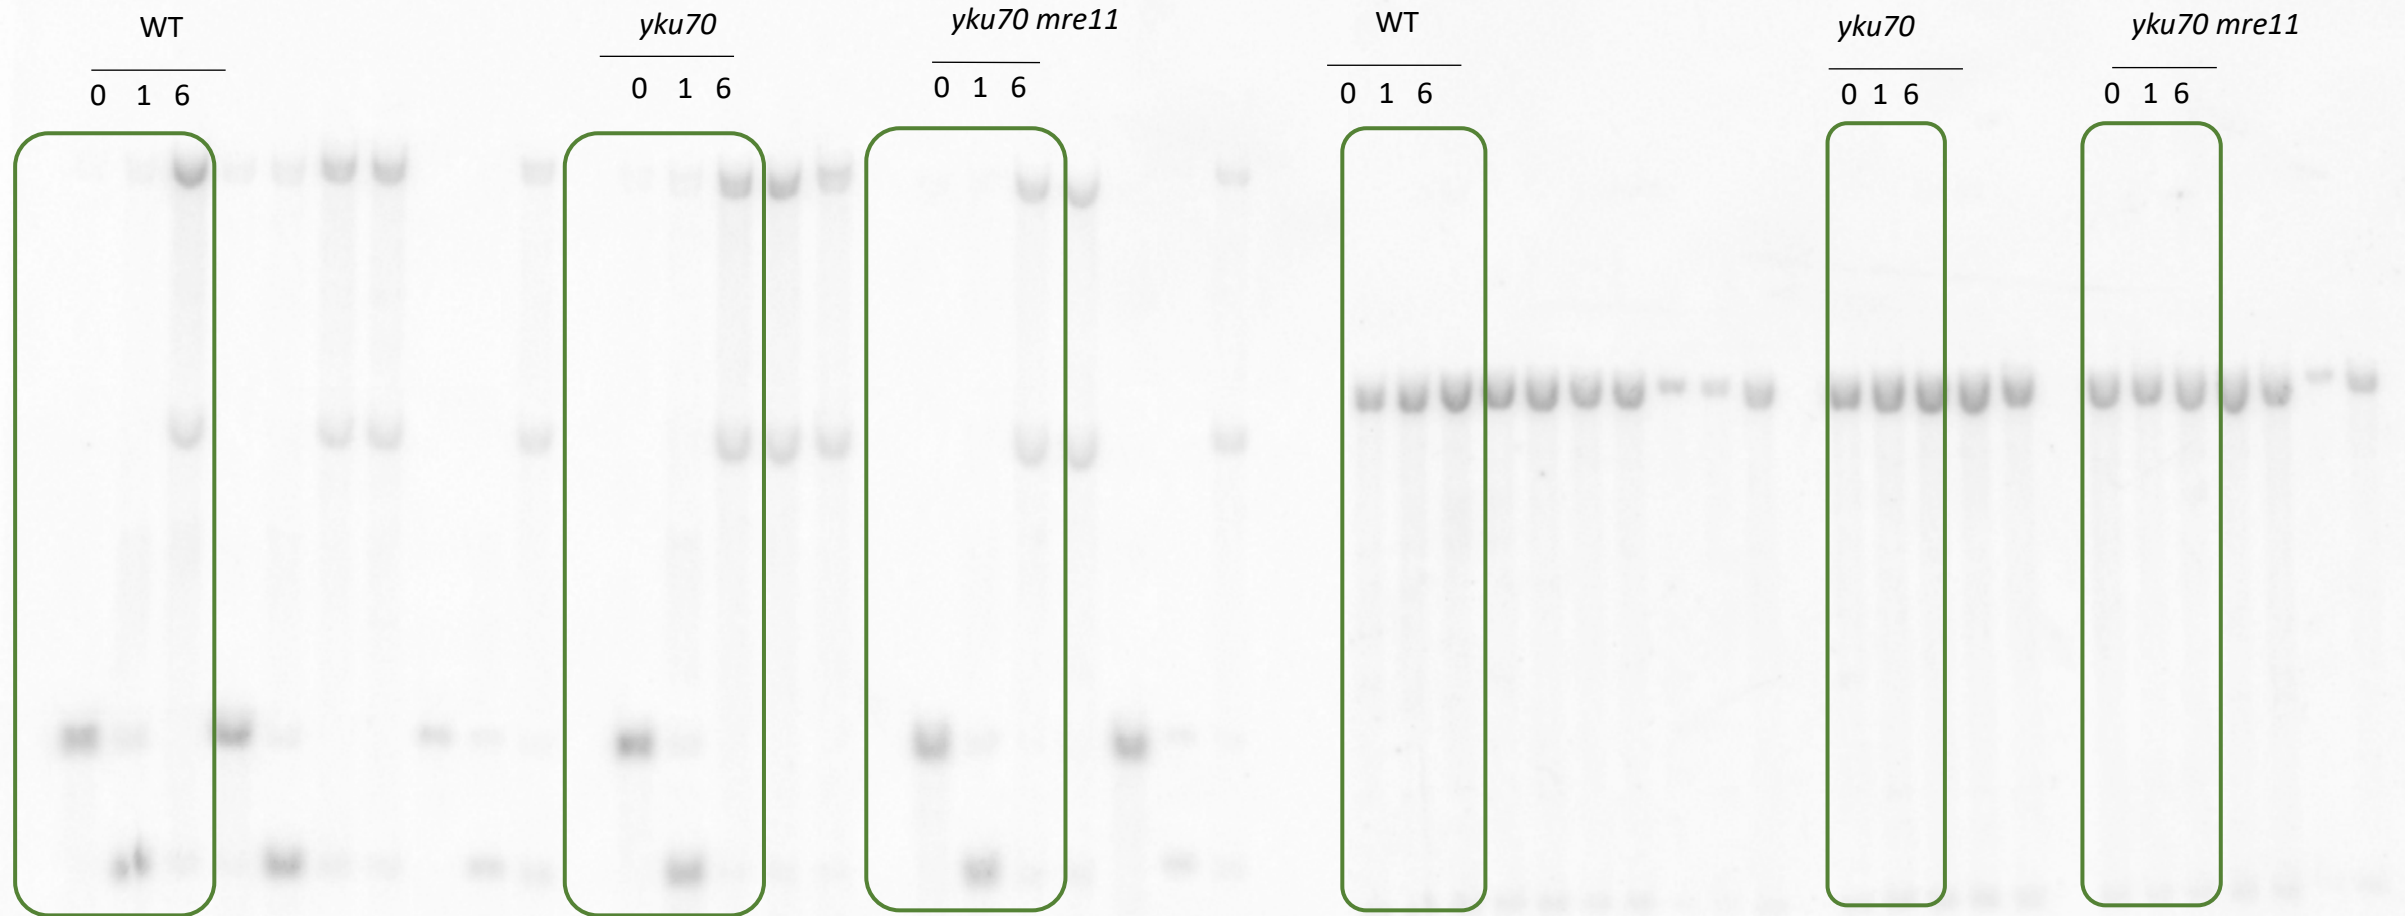

MATa distal probe

ACT1 probe

Figure 6B

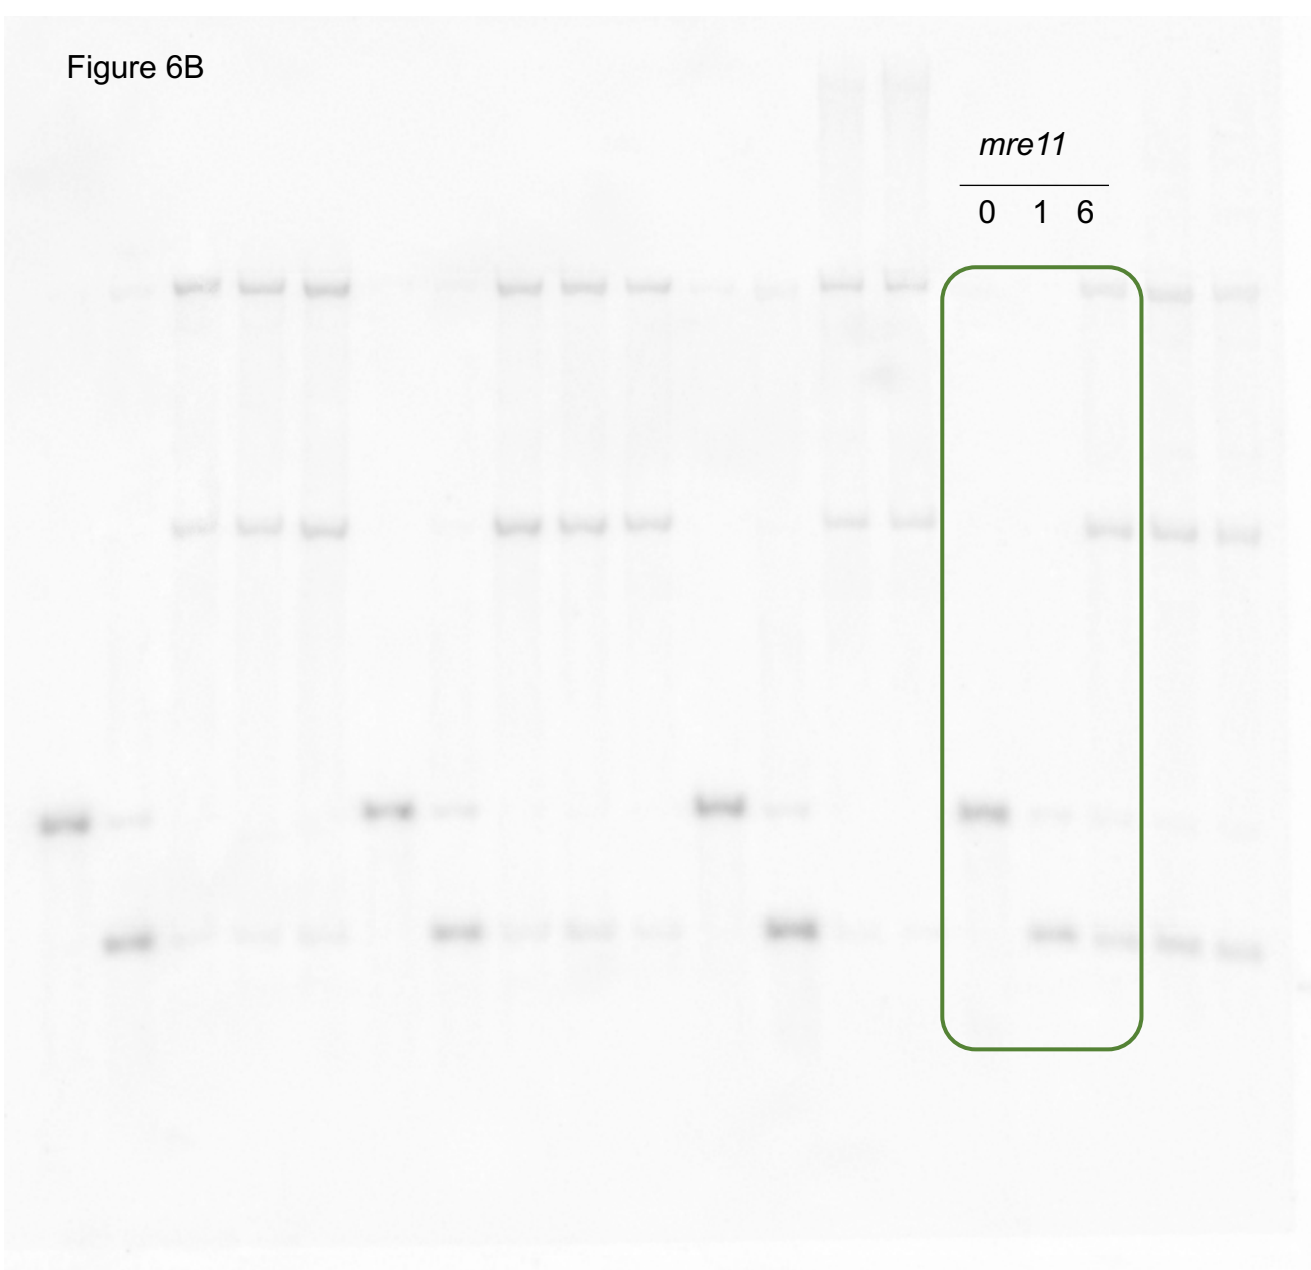

MATa distal probe

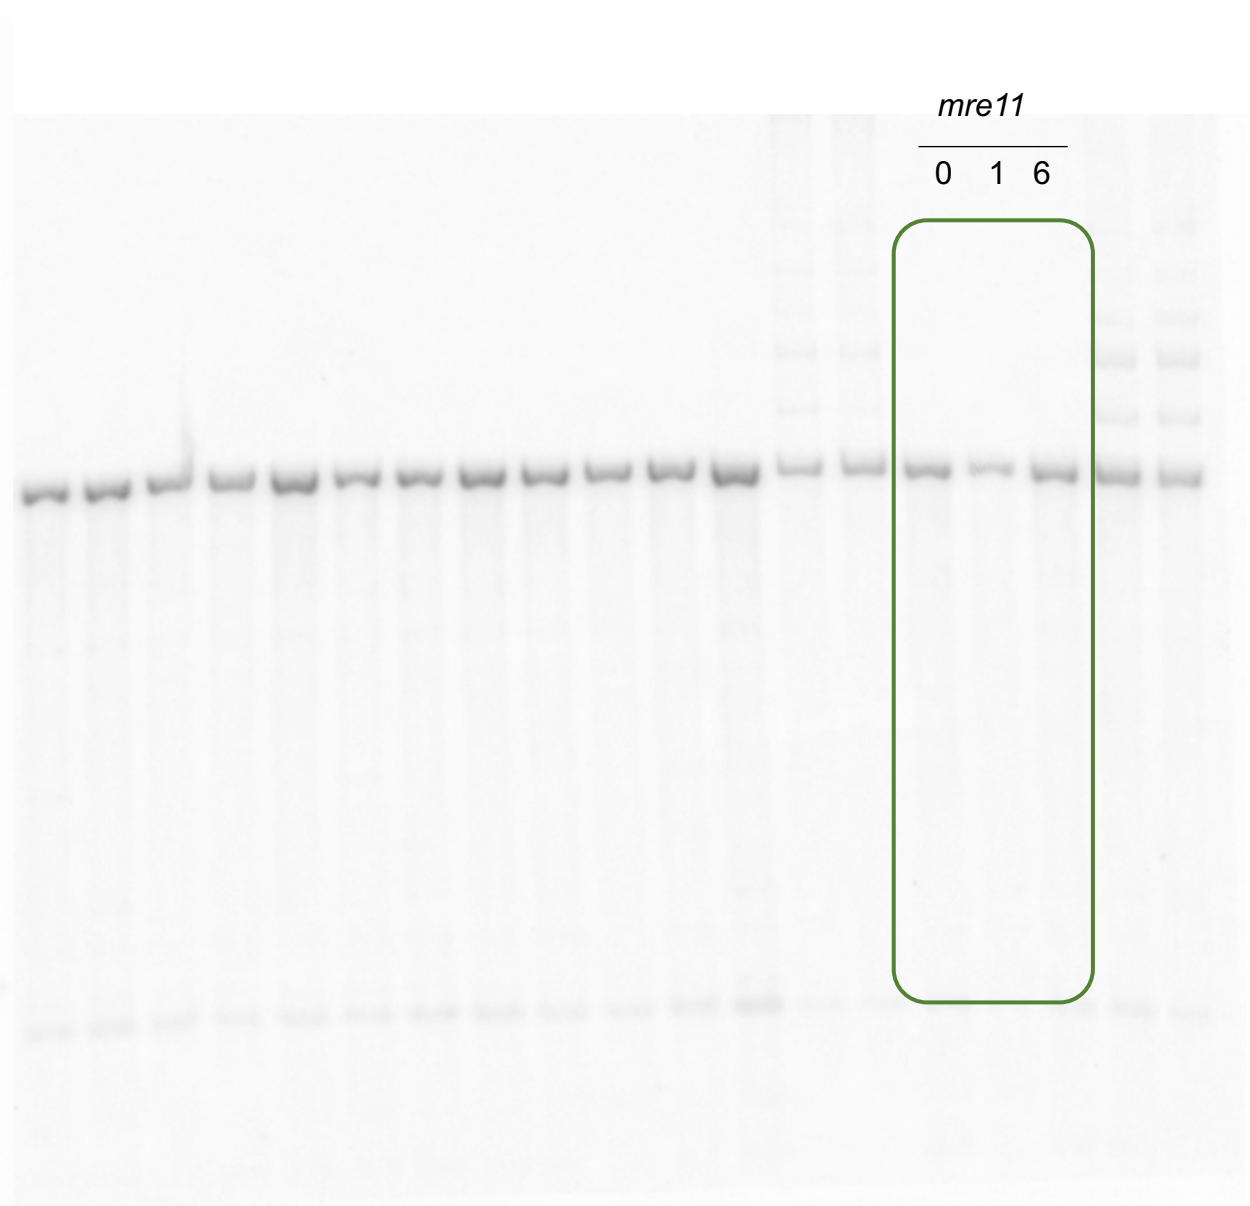

ACT1 probe

Figure 6C

WT

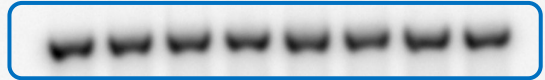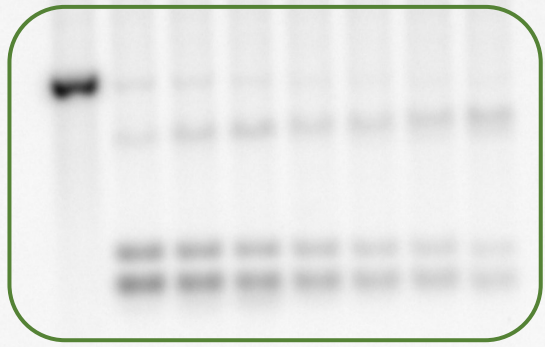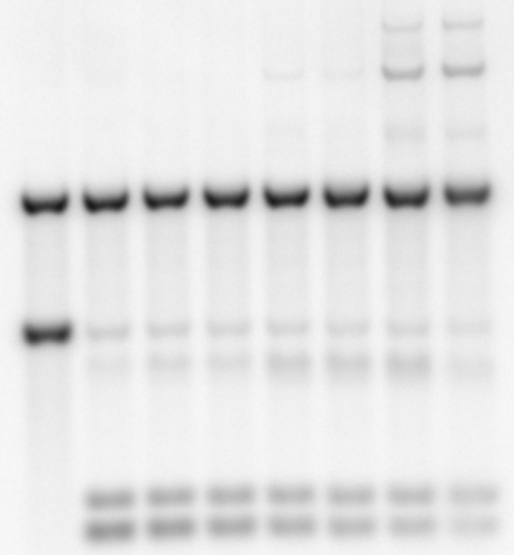

mre11

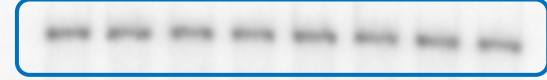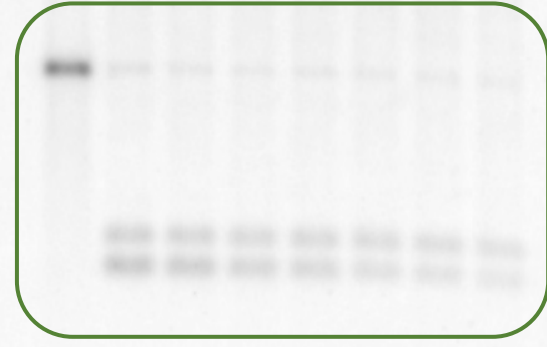

BPL1 probe

MATa probe

Figure 6C

yku70

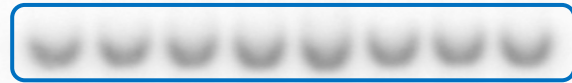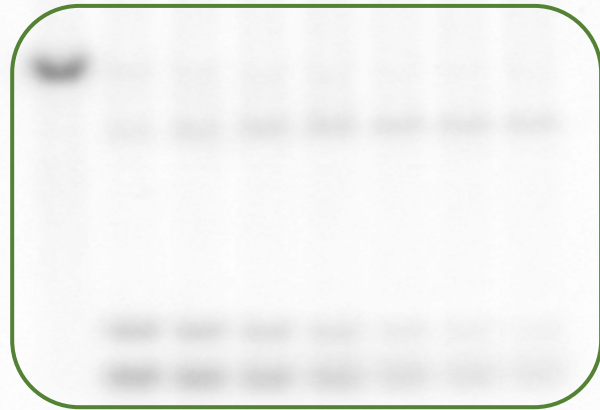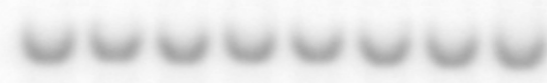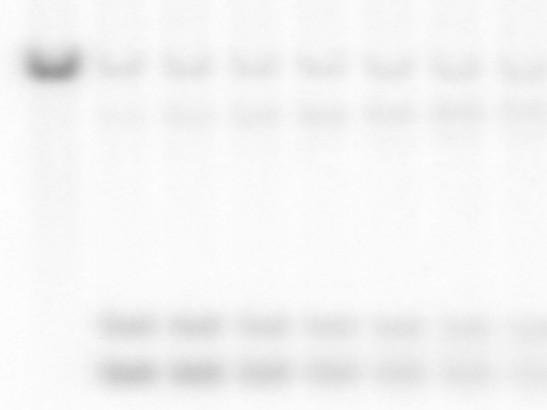

yku70 mre11

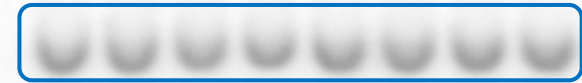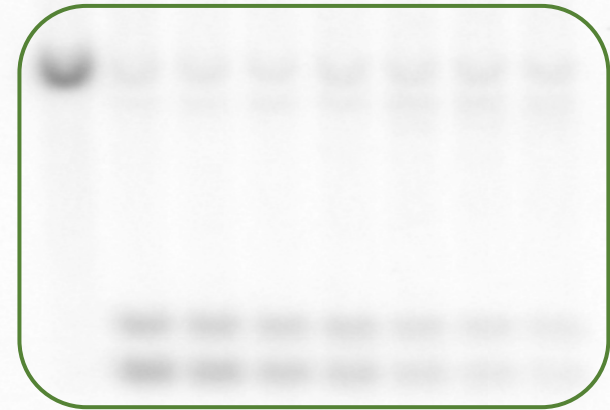

BPL1 probe

MATa probe
