# Supplementary material
Source: PubMed Central journal article supplement (PMC8126933)
Supplement: EMBJ-40-e104847-s004.pdf [file EMBJ-40-e104847-s004.pdf]

## Expanded View Figures

### Figure EV1. BIR efficiency is mildly decreased in annealing mutants.

- A Schematic of the H-O BIR assay. DSB is induced at a modified *MATa* locus (Chr. III). Strand invasion occurs within the "Z" sequence (blue box) and DNA synthesis continues to the end of the chromosome.
- B Representative Southern blots showing DSB repair products in WT, *rad59Δ*, *rad52-R70A*, and *rad59Δ rad52-R70A* cells. DNA was digested with *Bsp1286I* and probed with a *MAT*-distal sequence (yellow box in panel A).
- C Viability of indicated strains is shown (mean  $\pm$  SD;  $n = 3$ ).
- D Repair efficiency compared to parental *MATa* at time 0 h (left) and repair efficiency of indicated mutants compared to WT by 6 h (right) (mean  $\pm$  SD;  $n \geq 3$ ).
- E Representative Southern blots showing BIR repair product in H-O system in WT and indicated mutant cells.
- F Repair efficiency compared to parental *MATa* at time 0 h (left) and repair efficiency of indicated mutants compared to WT by 6 h (right) (mean  $\pm$  SD;  $n \geq 3$ ).
- G Model presenting the possible function of DNA binding/annealing domain of Rad52 in stabilizing the D-loop. Rad52 stabilizes/extends D-loop by three-strand exchange (left) or Rad52 anneals a 3' invading strand unwound from its template back to disrupted, but still RPA-bound, D-loop (right).

Data information: Welch's unpaired *t*-test was used to determine the *P*-value in all panels. \**P*-value 0.01 to 0.05, significant; \*\**P*-value 0.001 to 0.01, very significant; \*\*\**P*-value 0.0001 to 0.001, extremely significant; \*\*\*\**P* < 0.0001, extremely significant; *P*  $\geq$  0.05, not significant (ns).

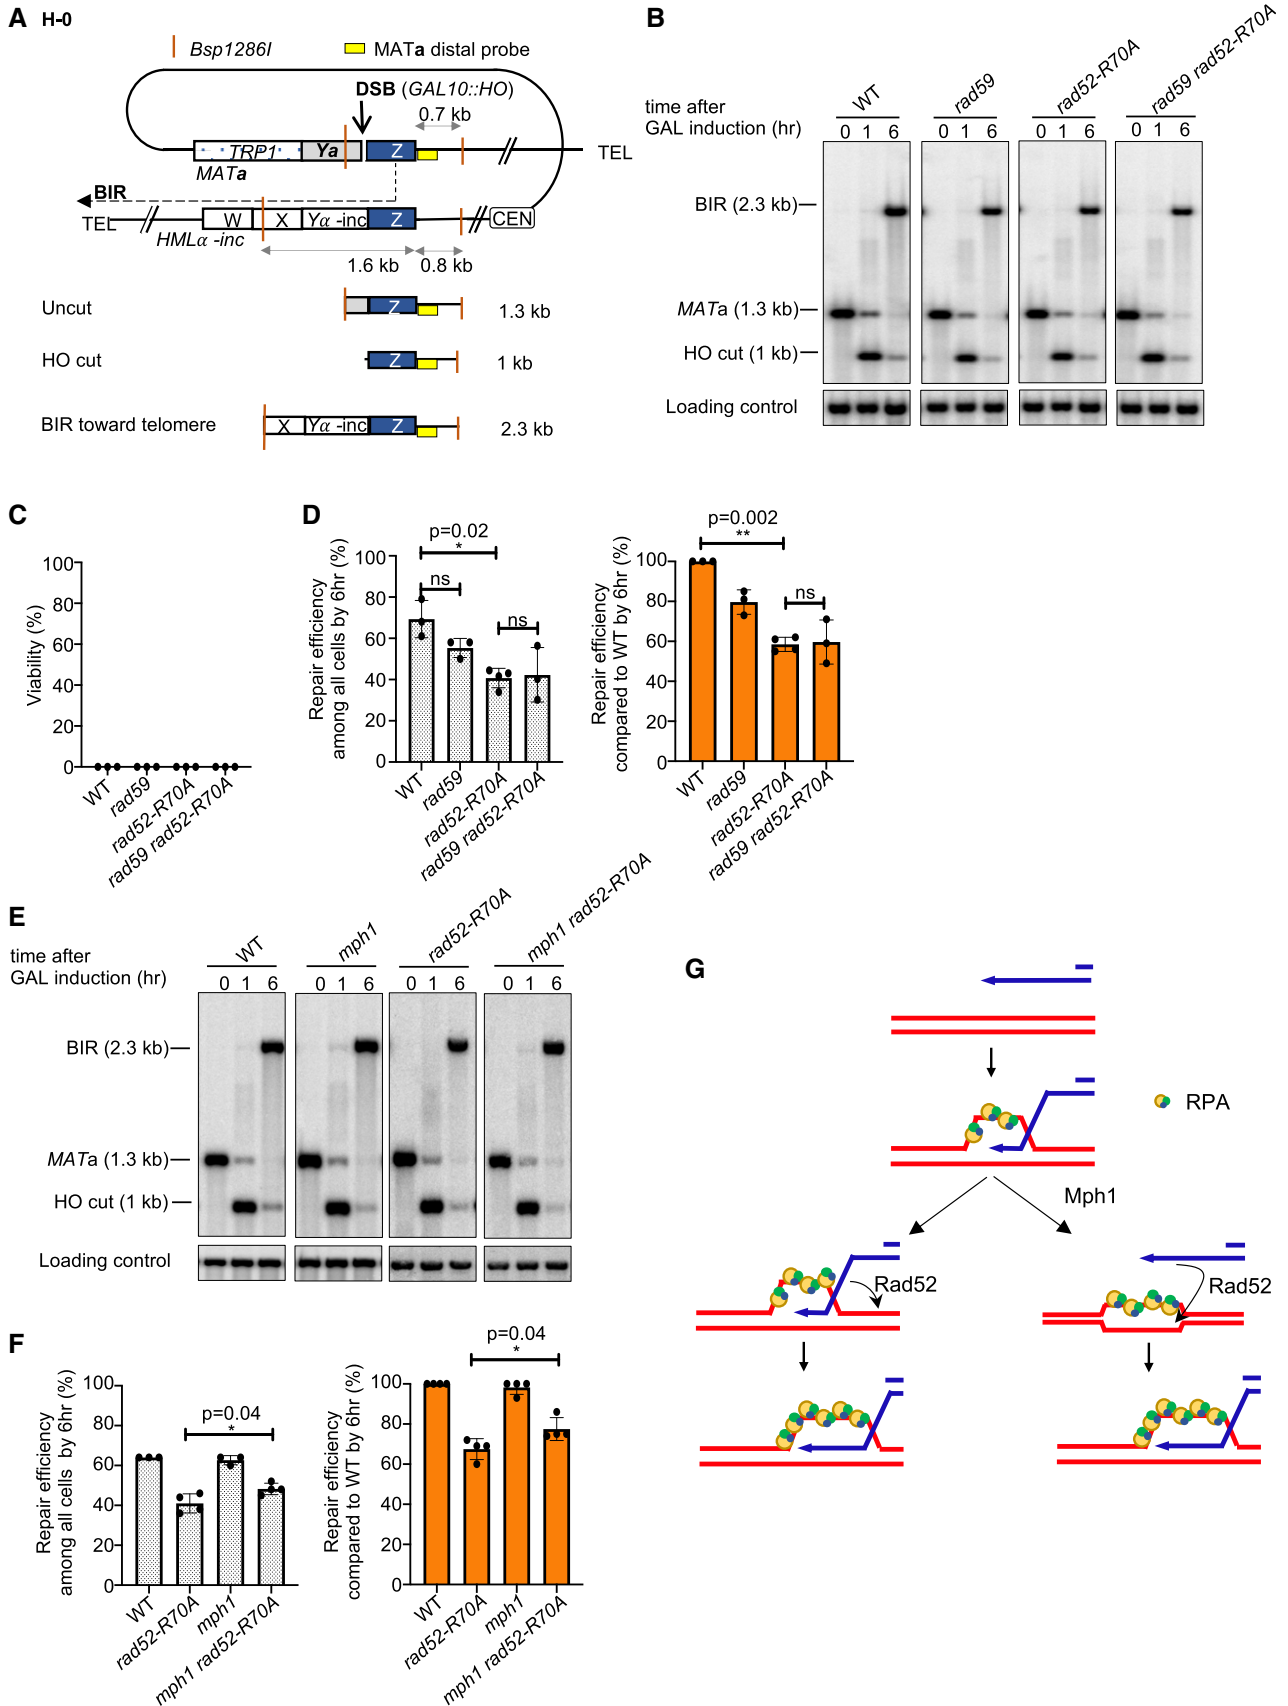

Figure EV1.

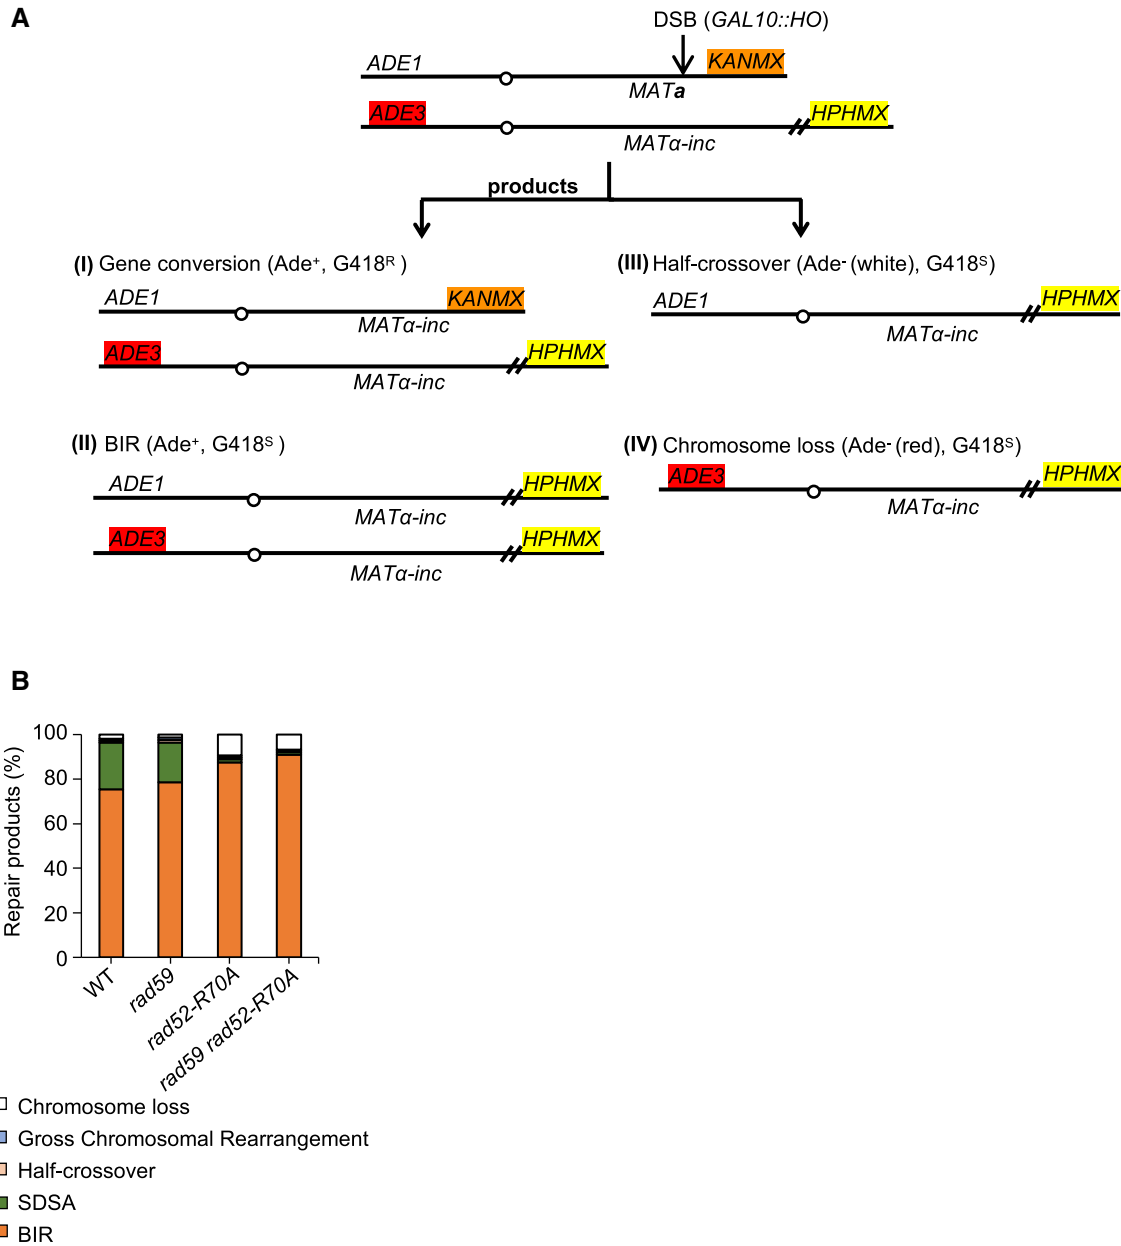

**Figure EV2. Analysis of BIR efficiency in a disomic BIR system in annealing mutants.**

- A Schematic of the disomic BIR assay. DSB is induced at a modified *MATa* locus on a truncated chromosome III, with only 46 bp homology to the right of the DSB. Strand invasion occurs within *MAT* sequences within the full-length chromosome III and replication continues until the end of the template chromosome. Chromosome ends are marked with *ADE1*, *ADE3*, *KANMX*, and *HPHMX* to distinguish different repair products or chromosome loss.
- B Percentage of different repair products and chromosome loss. At least 500 colonies from YEP-Galactose plates were scored per mutant.

**A H-150**

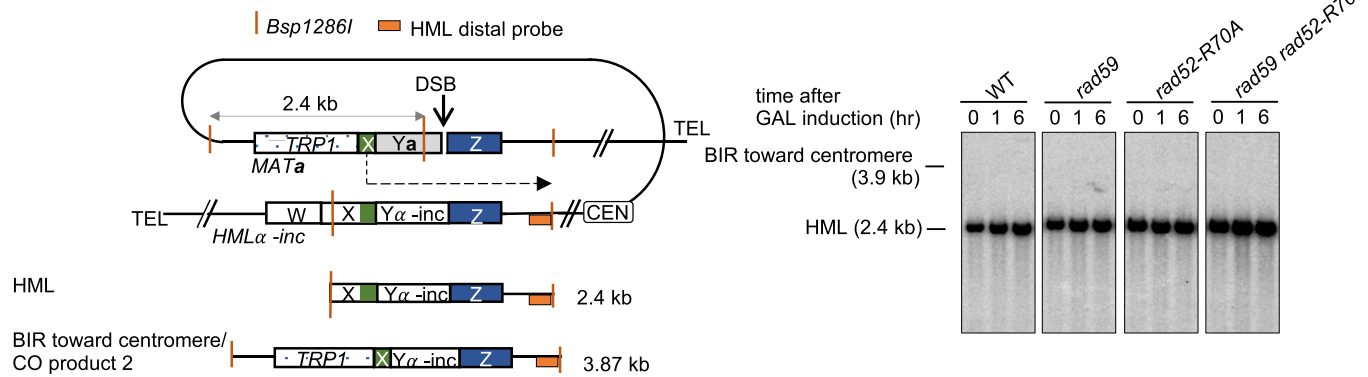

**B HR-0**

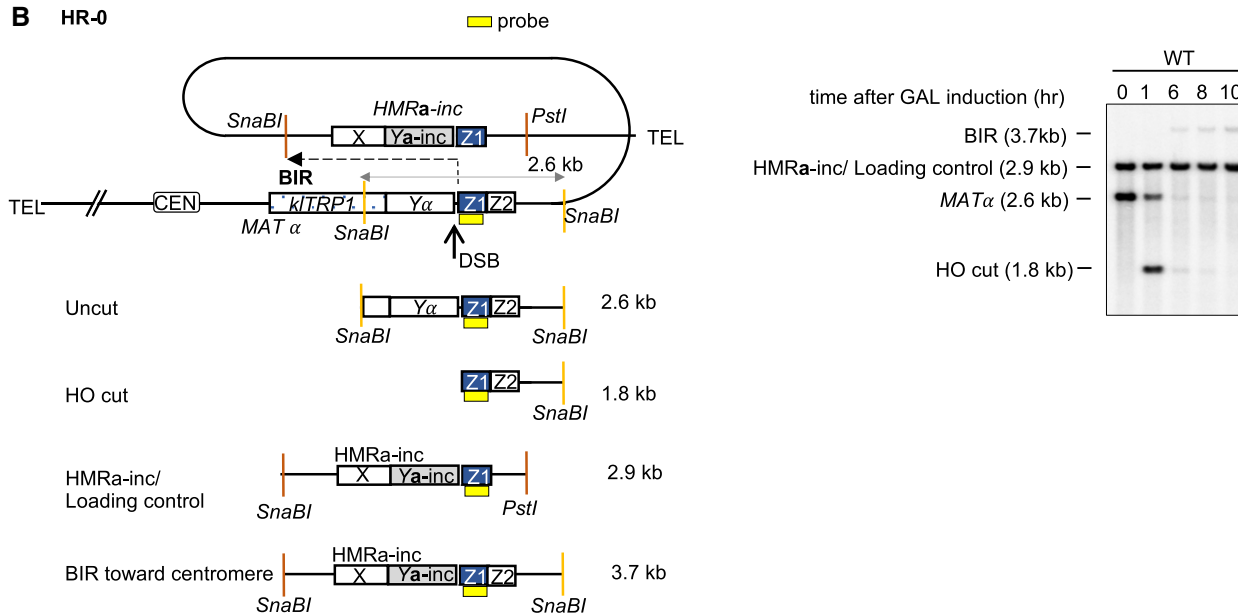

**Figure EV3. Analysis of BIR toward the centromere.**

- A Schematic of H-150 assay with position of HML distal probe (left) and representative Southern blot (right) are shown. No BIR product was detected in the direction of the centromere.
- B Schematic of HR-0 assay with sites of restriction enzymes, position of probe, and size of different bands (left) and representative Southern blot (right) are shown. Weak BIR product is visible.

**Figure EV4. Analysis of Sir2 role in repair pathway choice when the template is within unsilenced region.**

- A Schematic of recombination assay on chromosome V, where a break is induced at *URA3* and is repaired with a partial *URA3* region ("RA") fragment inserted on the other arm of the chromosome V.
- B Percentage of different repair products (left) and viability (right) of WT, *rad52-R70A*, and *sir2Δ* cells (mean ± SD; n = 3).
- C Representative of Southern blots (left) and graph showing kinetics of BIR in H-O assay (right) of WT and *sir2Δ* cells (mean ± SD; n = 3).

Data information: Welch's unpaired *t*-test was used to determine the *P*-value in all panels.

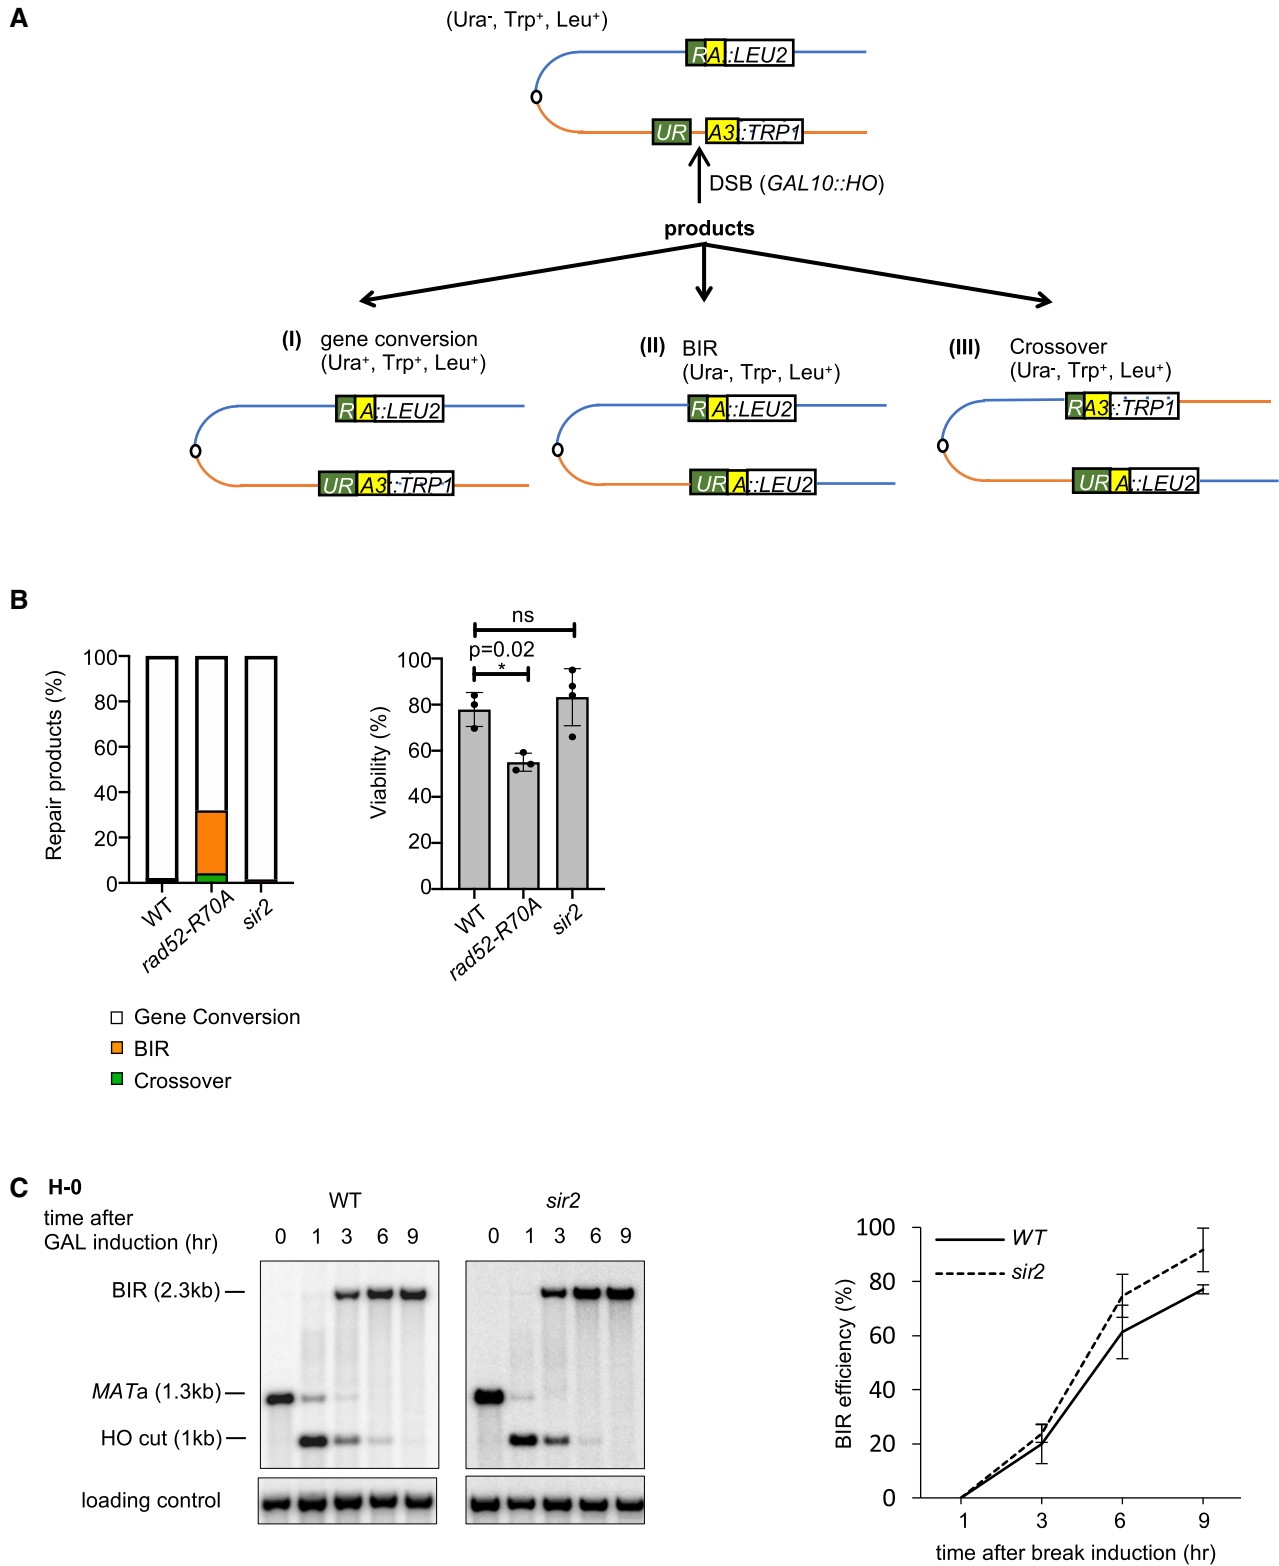

Figure EV4.

**Figure EV5. MRX complex suppresses BIR in allelic recombination.**

A Percentage of BIR and chromosome loss in WT and *mre11Δ* cells in allelic recombination. Chi-square test is used to determine the *P*-value, number of colonies tested per mutant is indicated in Appendix Table S1.

B Schematic of allelic assay with a *TRP1* probe (yellow box) used for Southern blot analysis. Ethidium bromide gel (top) and Southern blot with *TRP1* probe (bottom) showing chromosome III of haploid parental strains, diploid, and BIR products of WT (left) and *mre11Δ* cells (right). \*\*\* depicts gross chromosomal arrangement event.

Data information: \**P*-value 0.01 to 0.05, significant; \*\**P*-value 0.001 to 0.01, very significant; \*\*\**P*-value 0.0001 to 0.001, extremely significant; \*\*\*\**P* < 0.0001, extremely significant; *P* ≥ 0.05, not significant (ns).

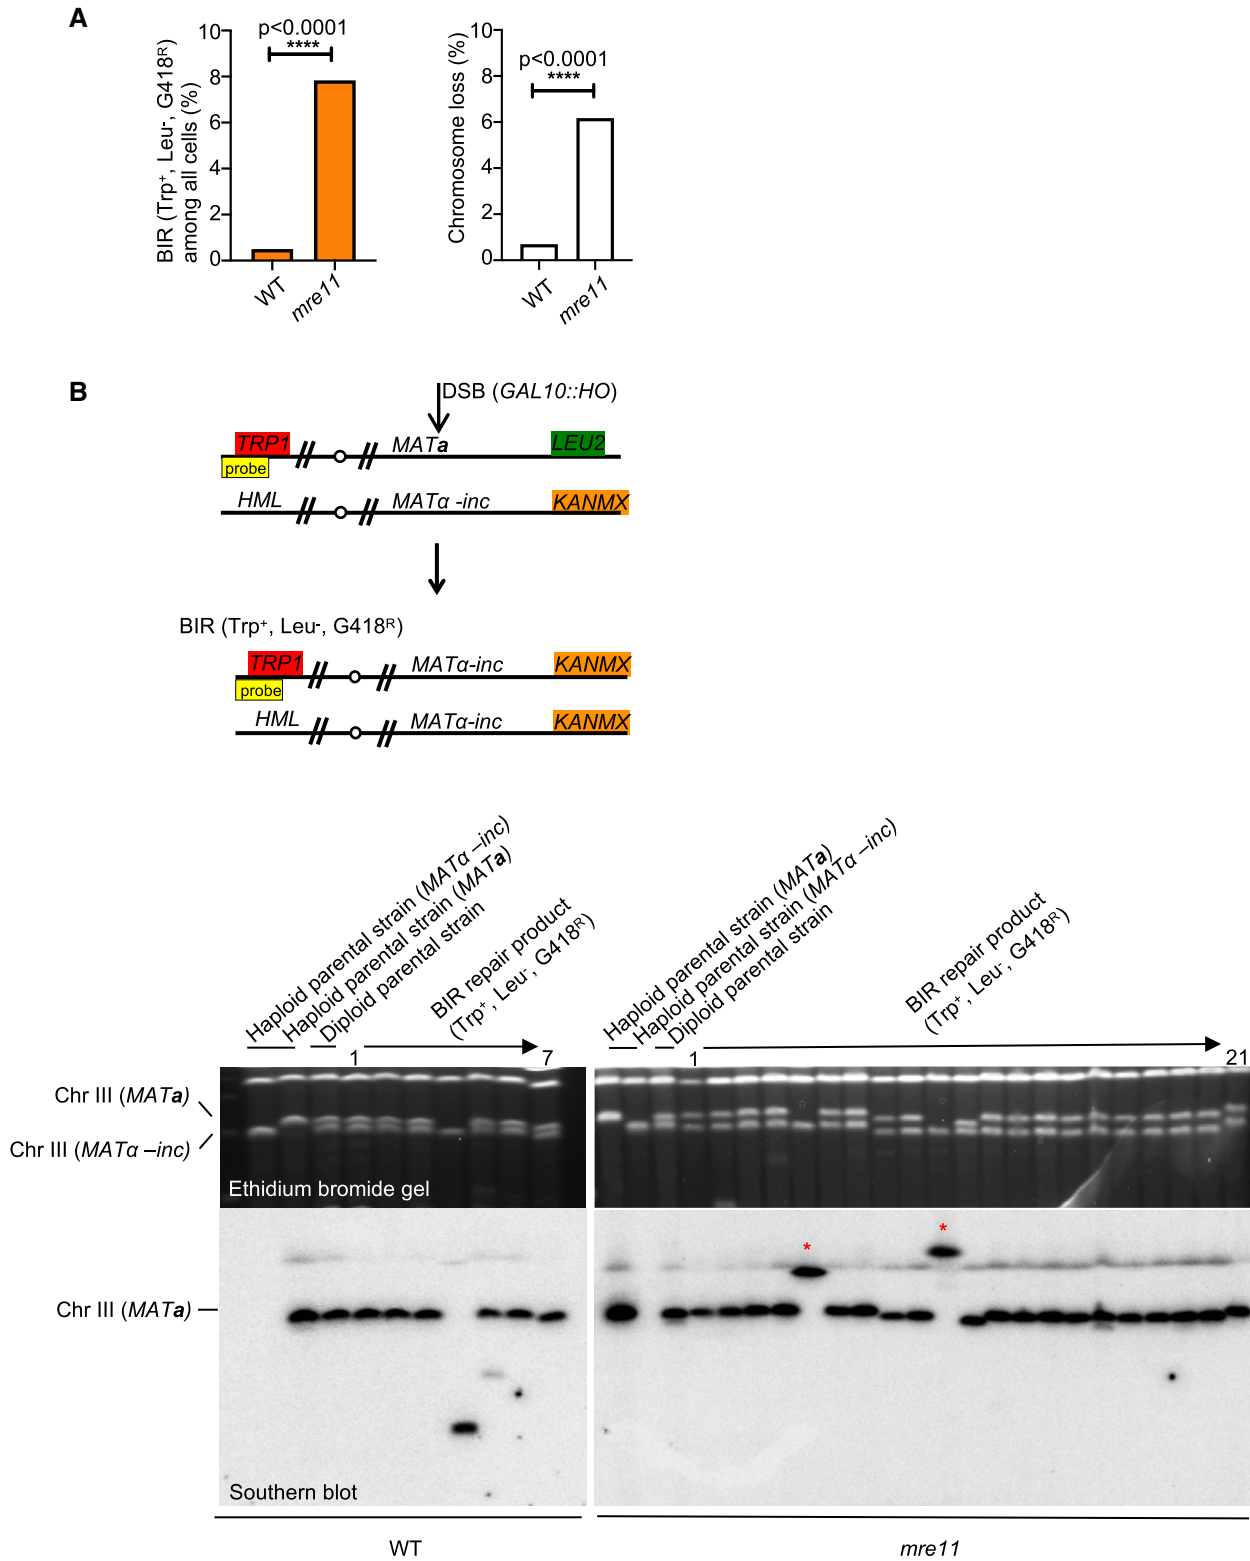

Figure EV5.
