# Supplementary material
Source: PubMed Central journal article supplement (PMC8126933)

Figure 1C

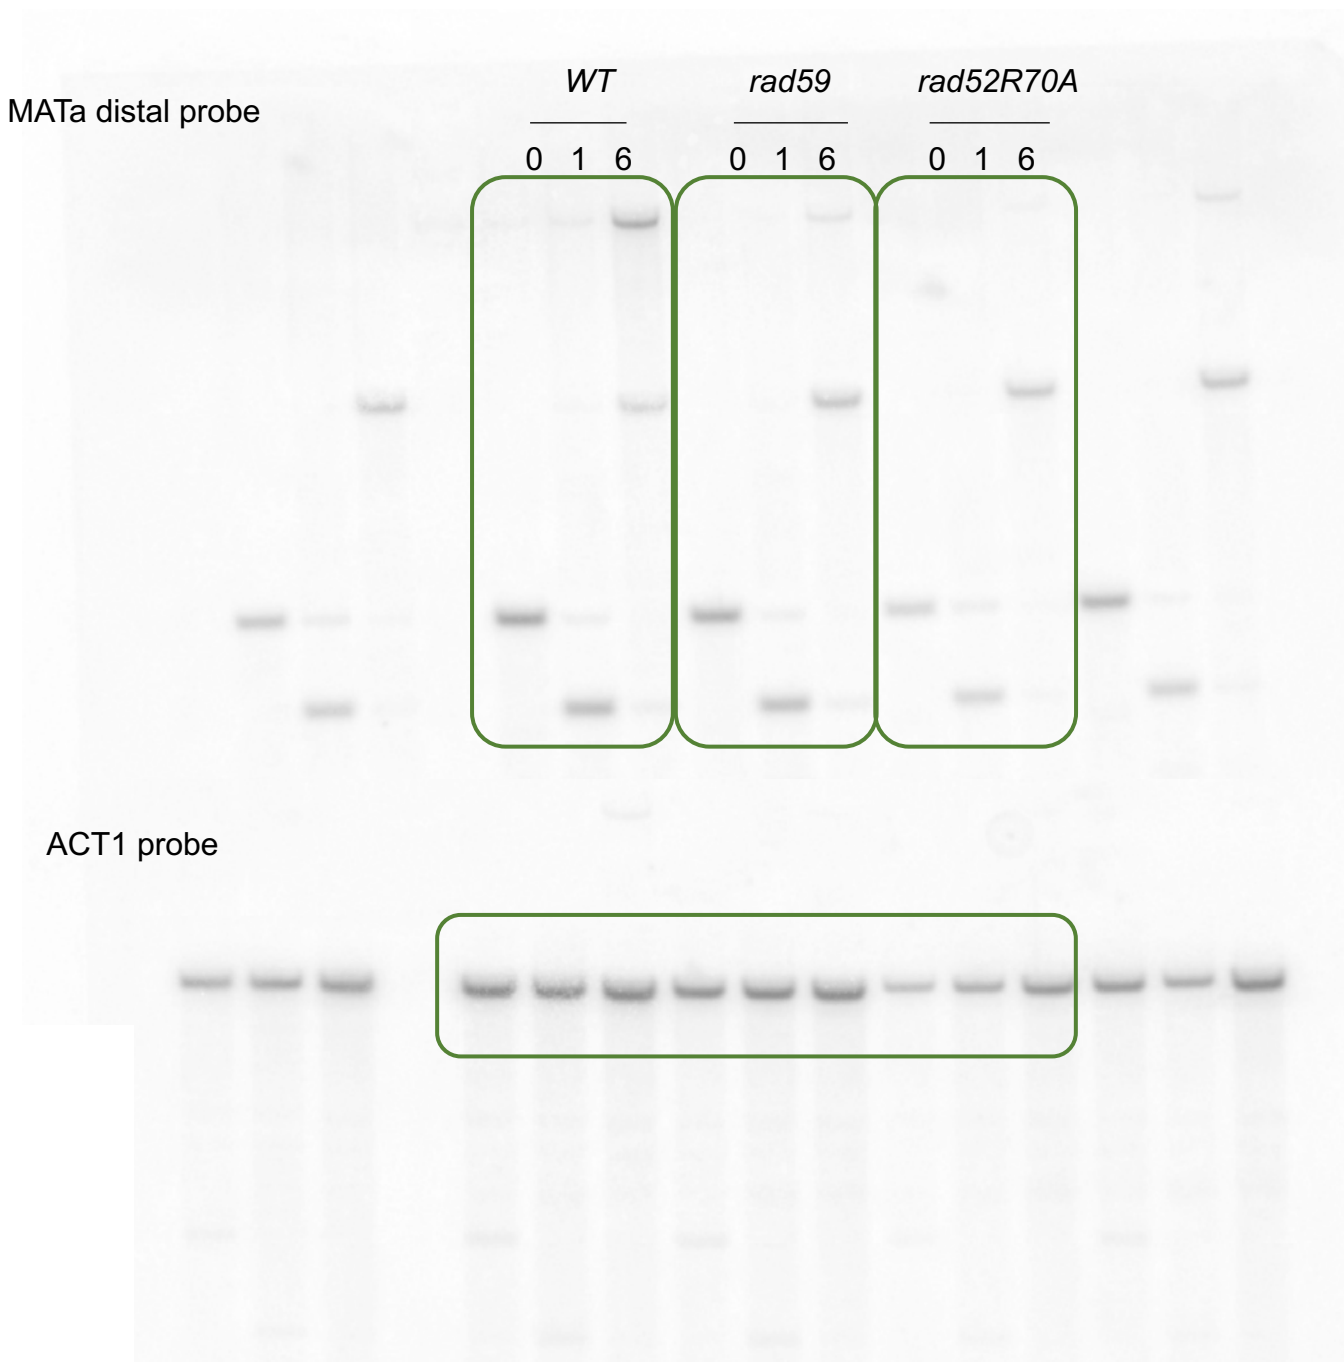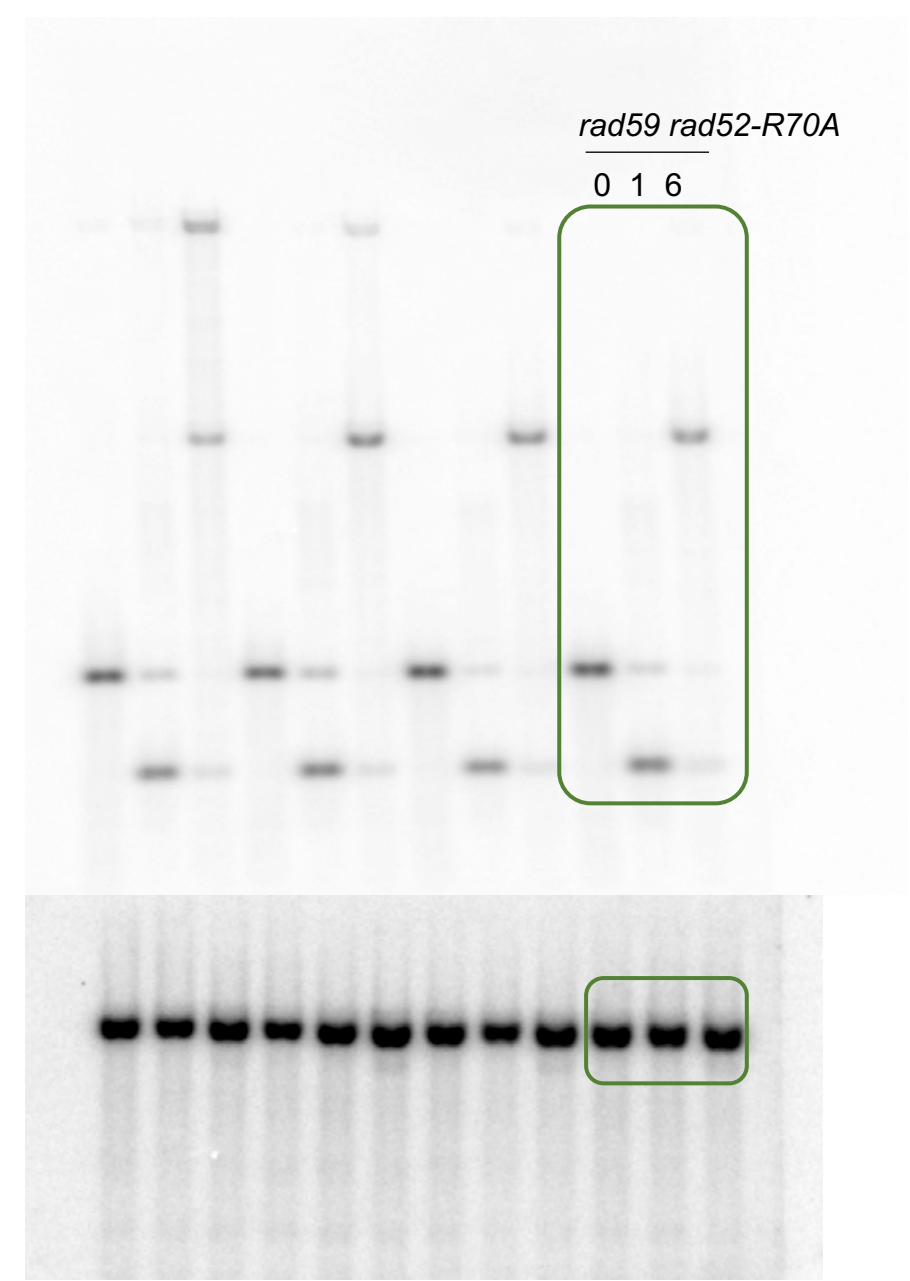

Figure 1H

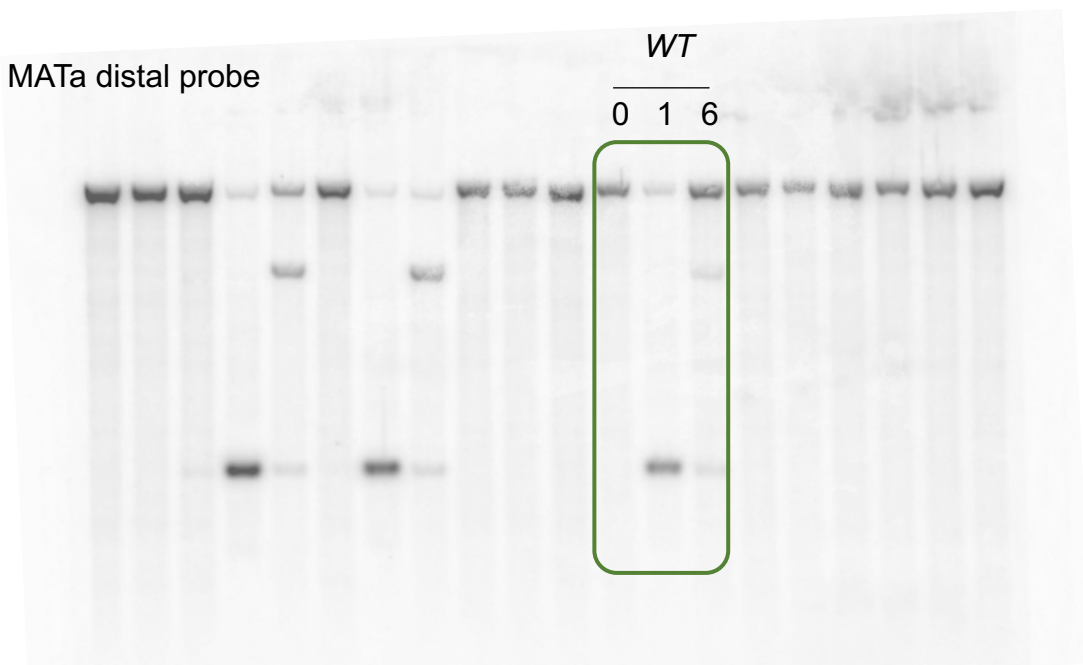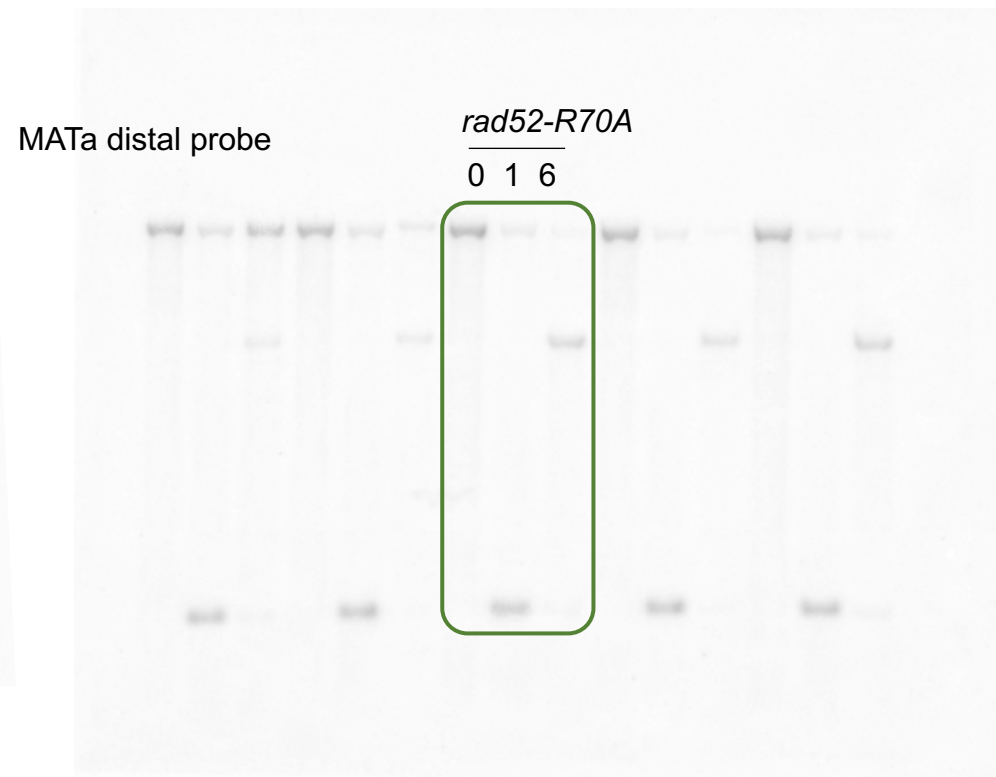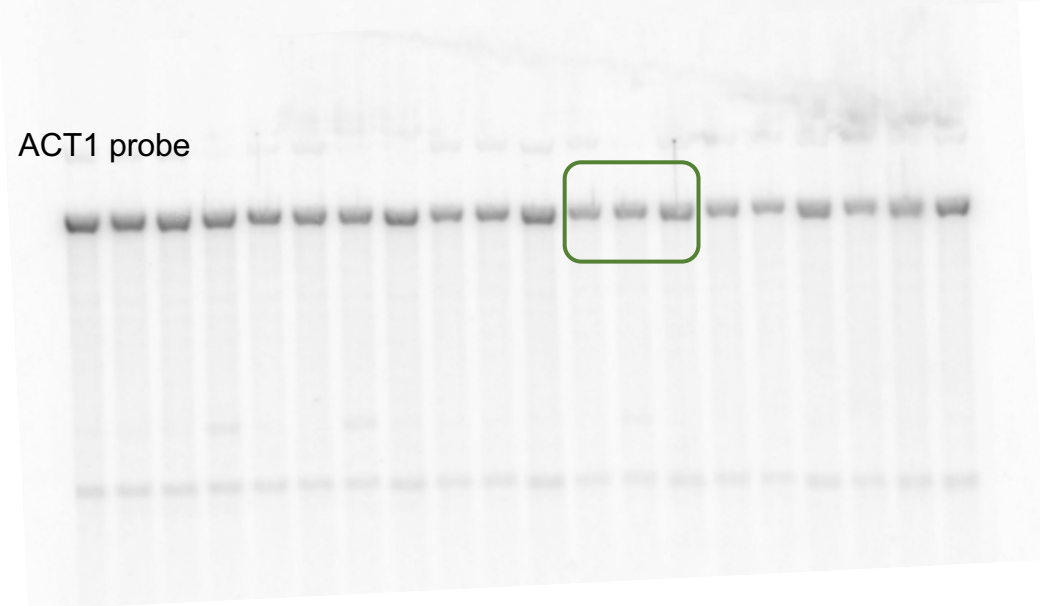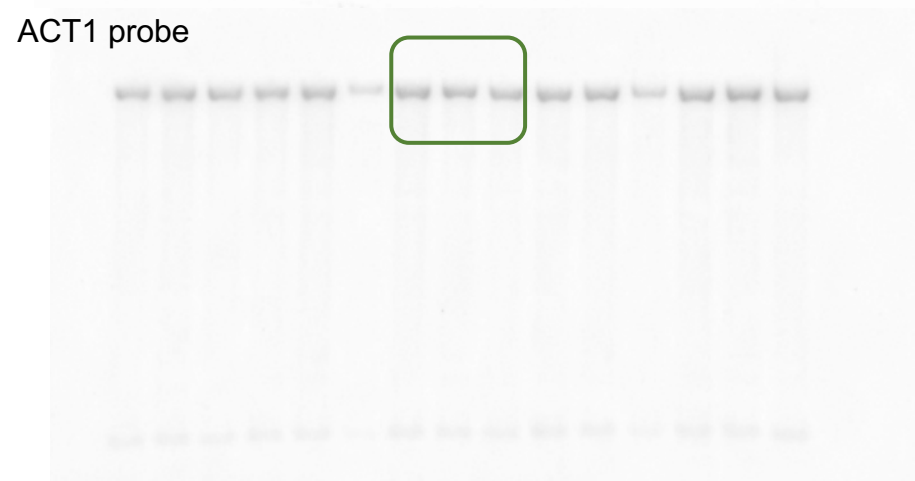

Figure 1H

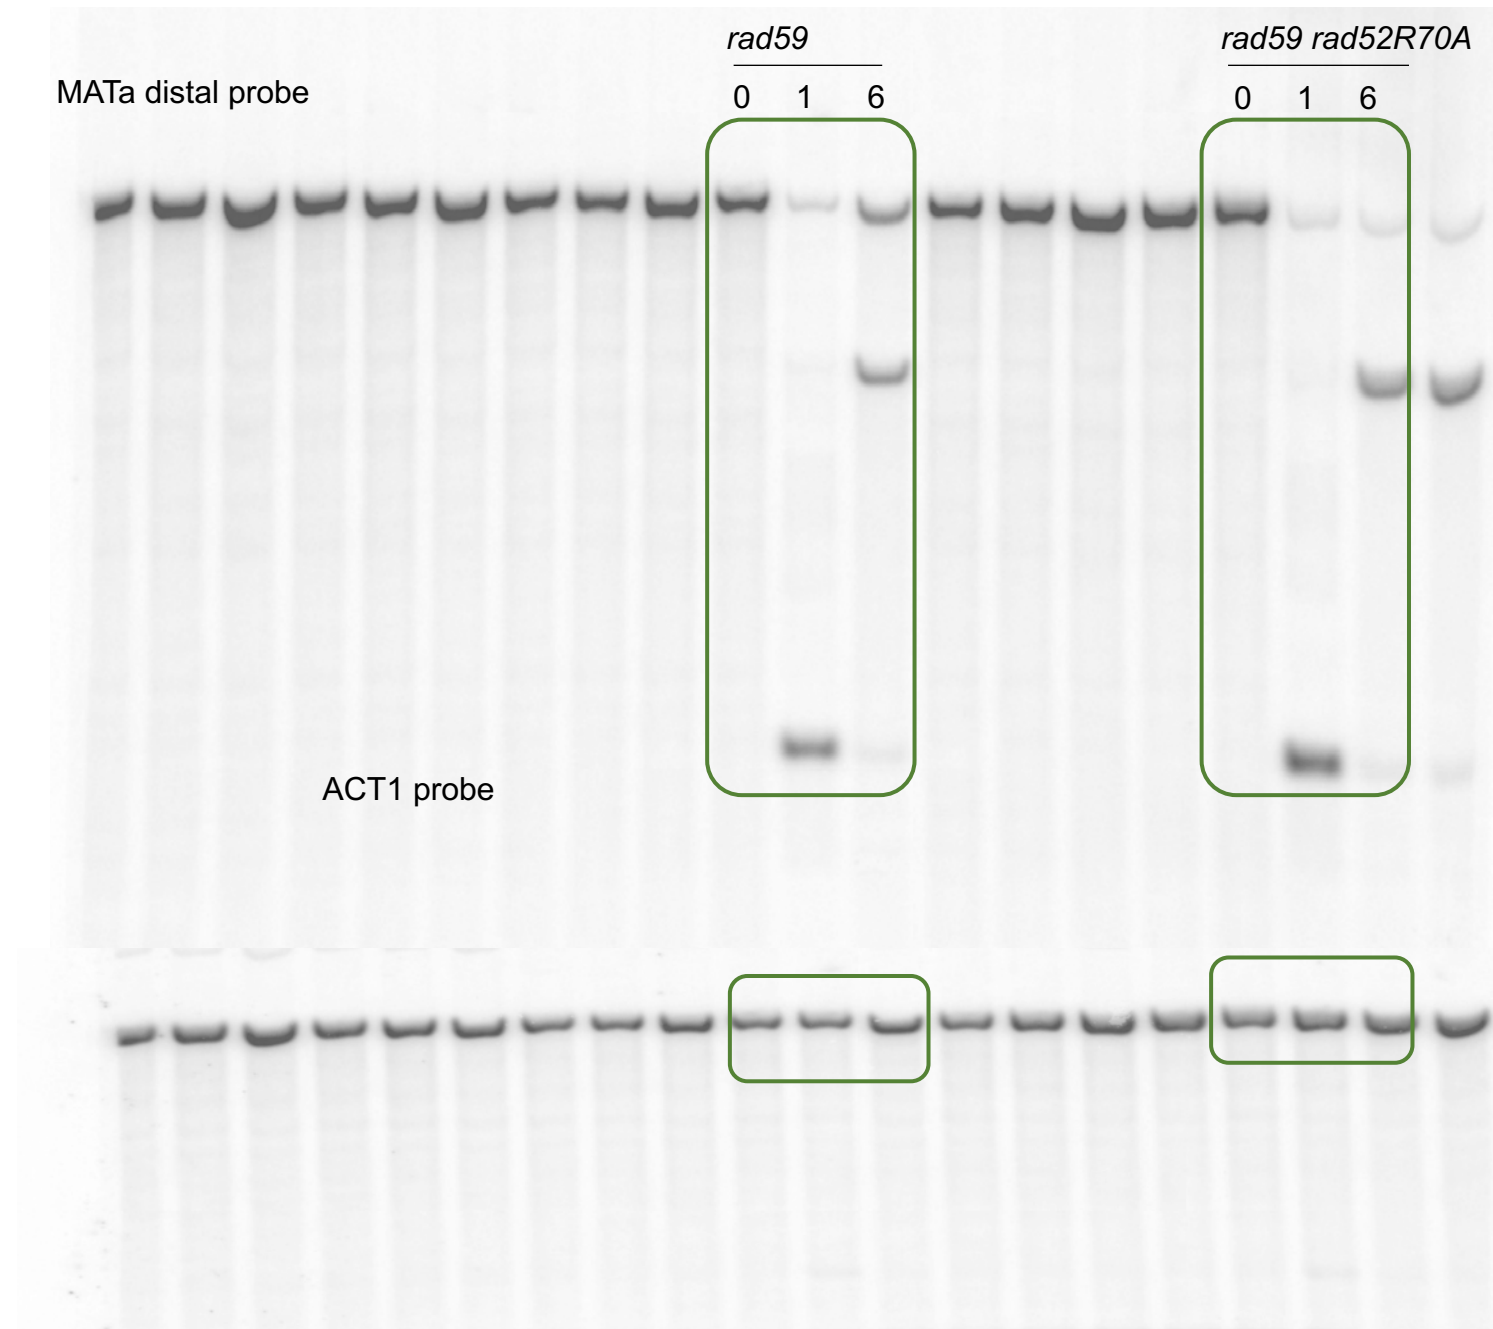

Supplement: EMBJ-40-e104847-s001.pdf [file EMBJ-40-e104847-s001.pdf]
